# Supplementary material
Source: PubMed Central journal article supplement (PMC3336157)

## Supporting Information

Credneramides A and B: Neuromodulatory Phenethylamine and  
Isopentylamine Derivatives of a Vinyl Chloride-containing Fatty Acid from  
*cf. Trichodesmium* sp. nov.

Karla L. Malloy,<sup>†</sup> Takashi L. Suyama,<sup>†</sup> Niclas Engene,<sup>†</sup> Hosana Debonisi,<sup>†,‡</sup> Zhengyu  
Cao,<sup>§</sup> Teatulohi Matainaho,<sup>⊥</sup> Carmenza Spadafora,<sup>||</sup> Thomas F. Murray<sup>§</sup>  
and William H. Gerwick<sup>\*,†</sup>

<sup>†</sup>Center for Marine Biotechnology and Biomedicine, Scripps Institution of Oceanography  
and Skaggs School of Pharmacy and Pharmaceutical Sciences, University of California at  
San Diego, La Jolla, California 92093

<sup>‡</sup> FCFRP - Universidade de São Paulo, Ribeirão Preto, Brazil

<sup>§</sup> Creighton University School of Medicine, Omaha, NE 68178

<sup>⊥</sup> Discipline of Pharmacology, School of Medicine and Health Sciences, University of  
Papua New Guinea, National Capital District, Papua New Guinea

<sup>||</sup> Instituto de Investigaciones Científicas Avanzadas y Servicios de Alta Tecnología,  
Center of Cellular Molecular Biology of Diseases, Clayton, Bldg. 219 P.O. Box 7250,  
Panama 5, Republic of Panama

S1: <sup>1</sup>H NMR spectrum of **1** (500 MHz, CDCl<sub>3</sub>)  
S2: <sup>1</sup>H NMR spectrum of **2** (600 MHz, CDCl<sub>3</sub>)  
S3: <sup>1</sup>H NMR spectrum of **3** (500 MHz, CDCl<sub>3</sub>)  
S4: <sup>13</sup>C NMR spectrum of **1** (75 MHz, CDCl<sub>3</sub>)  
S5: <sup>13</sup>C NMR spectrum of **2** (150 MHz, CDCl<sub>3</sub>)  
S6: <sup>13</sup>C NMR spectrum of **3** (75 MHz, CDCl<sub>3</sub>)  
S7: COSY spectrum of **1** (CDCl<sub>3</sub>)  
S8: COSY spectrum of **2** (CDCl<sub>3</sub>)  
S9: COSY spectrum of **3** (CDCl<sub>3</sub>)  
S10: HMBC spectrum of **1** (CDCl<sub>3</sub>)  
S11: HMBC spectrum of **2** (CDCl<sub>3</sub>)  
S12: HMBC spectrum of **3** (CDCl<sub>3</sub>)  
S13: HSQC spectrum of **1** (CDCl<sub>3</sub>)  
S14: HSQC spectrum of **2** (CDCl<sub>3</sub>)  
S15: HSQC spectrum of **3** (CDCl<sub>3</sub>)  
S16: NOESY spectrum of **1** (CDCl<sub>3</sub>)  
S17: NOESY spectrum of **2** (CDCl<sub>3</sub>)  
S18: ROESY spectrum of **1** (CDCl<sub>3</sub>)  
S19: 1D NOE of **1**, irr 5.77 ppm (CDCl<sub>3</sub>)  
S20: 1D ROE of **3**, irr 2.73 ppm (CDCl<sub>3</sub>)  
S21: 1D ROE of **3**, irr 5.79 ppm (CDCl<sub>3</sub>)  
S22: 1D ROE of **3**, irr 2.17 ppm (CDCl<sub>3</sub>)

S1: <sup>1</sup>H NMR spectrum of 1 (500 MHz, CDCl<sub>3</sub>)

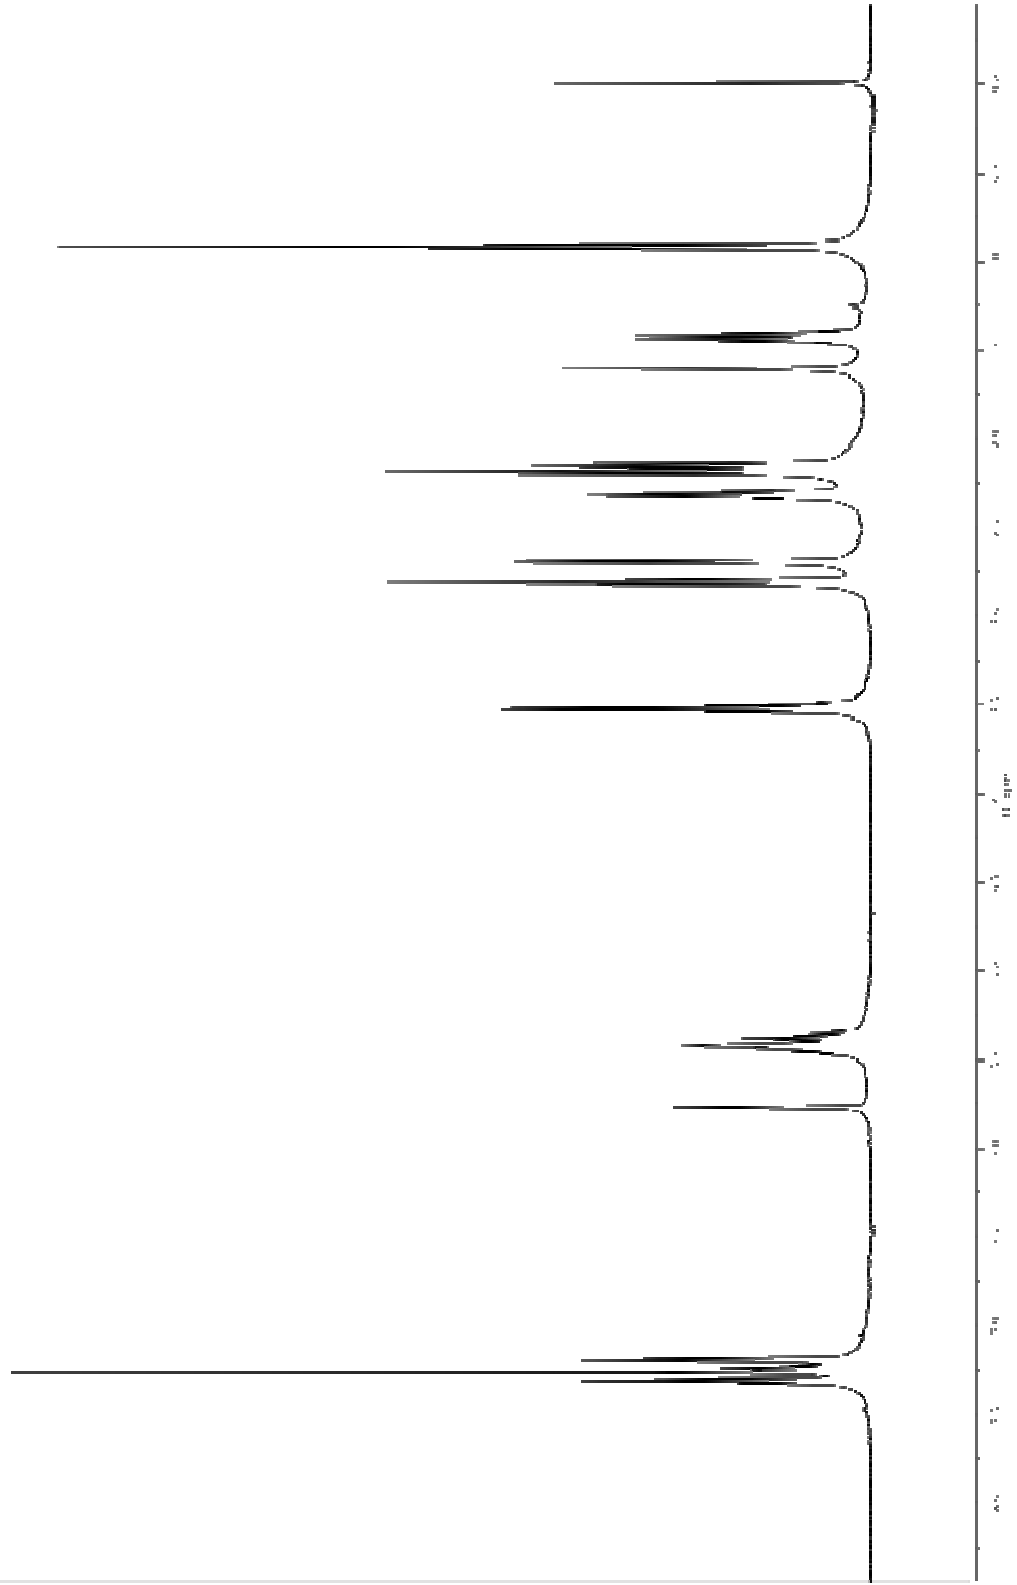

S2:  $^1\text{H}$  NMR spectrum of **2** (600 MHz,  $\text{CDCl}_3$ )

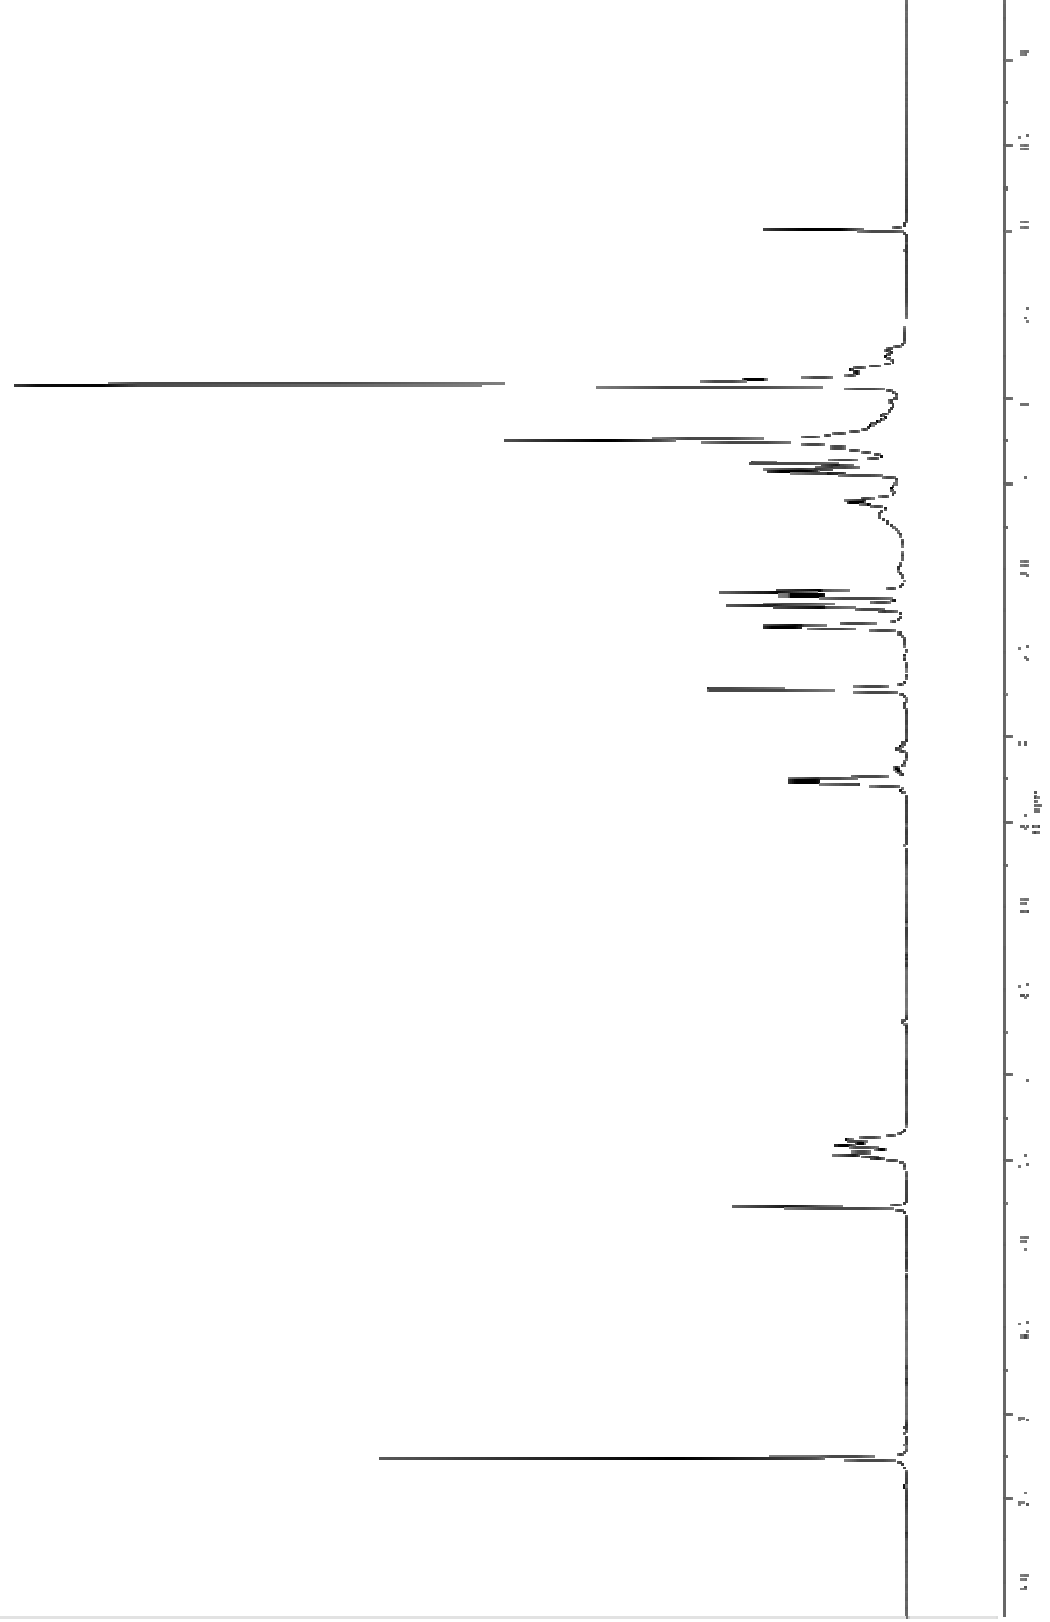

S3: <sup>1</sup>H NMR spectrum of 3 (500 MHz, CDCl<sub>3</sub>)

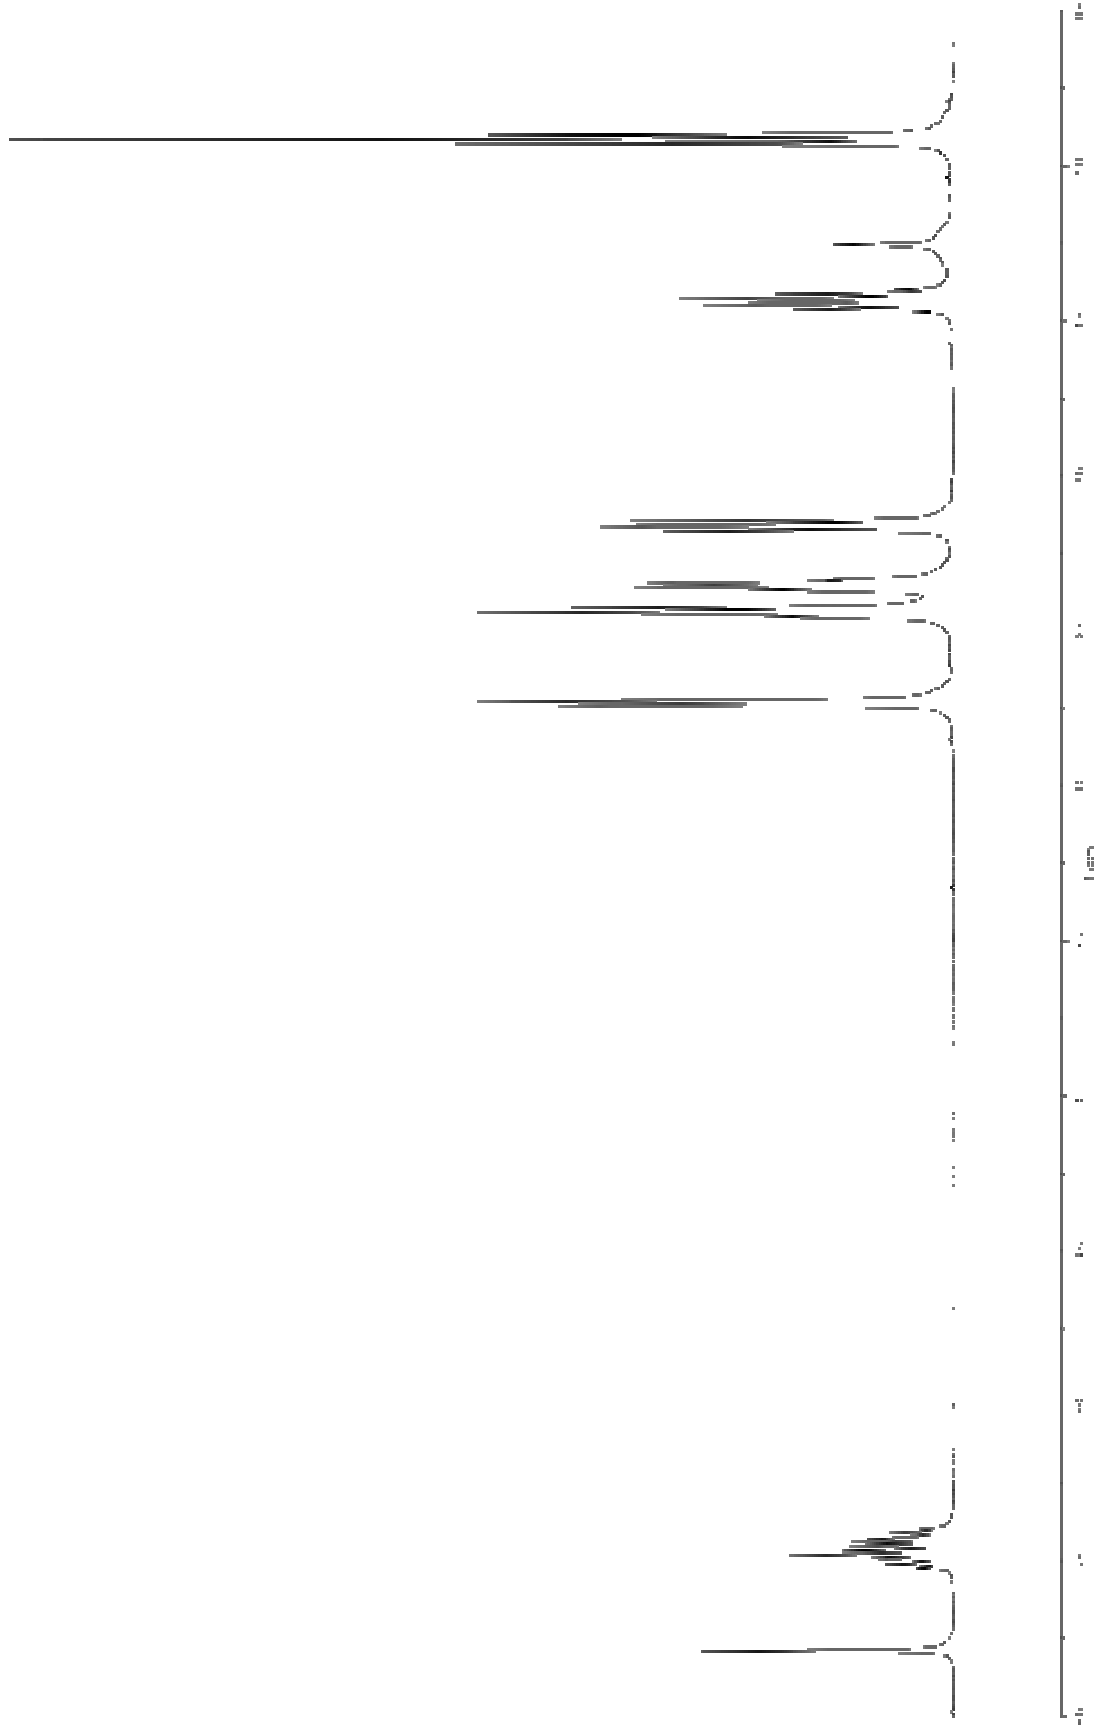

S4  $^{13}\text{C}$  NMR spectrum of **1** (300 MHz,  $\text{CDCl}_3$ )

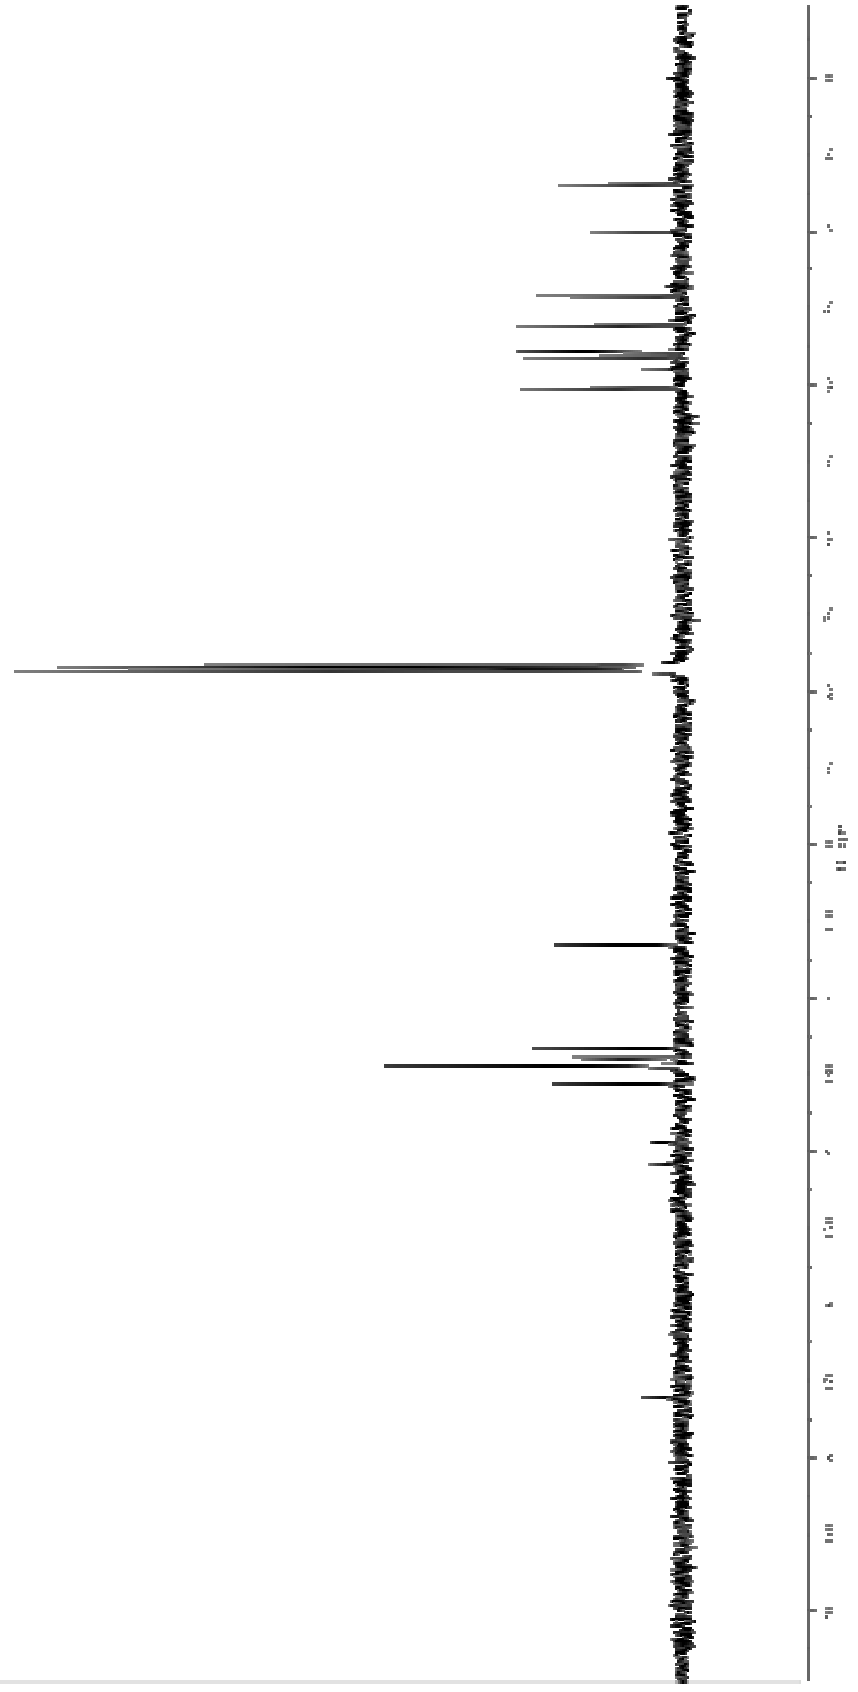

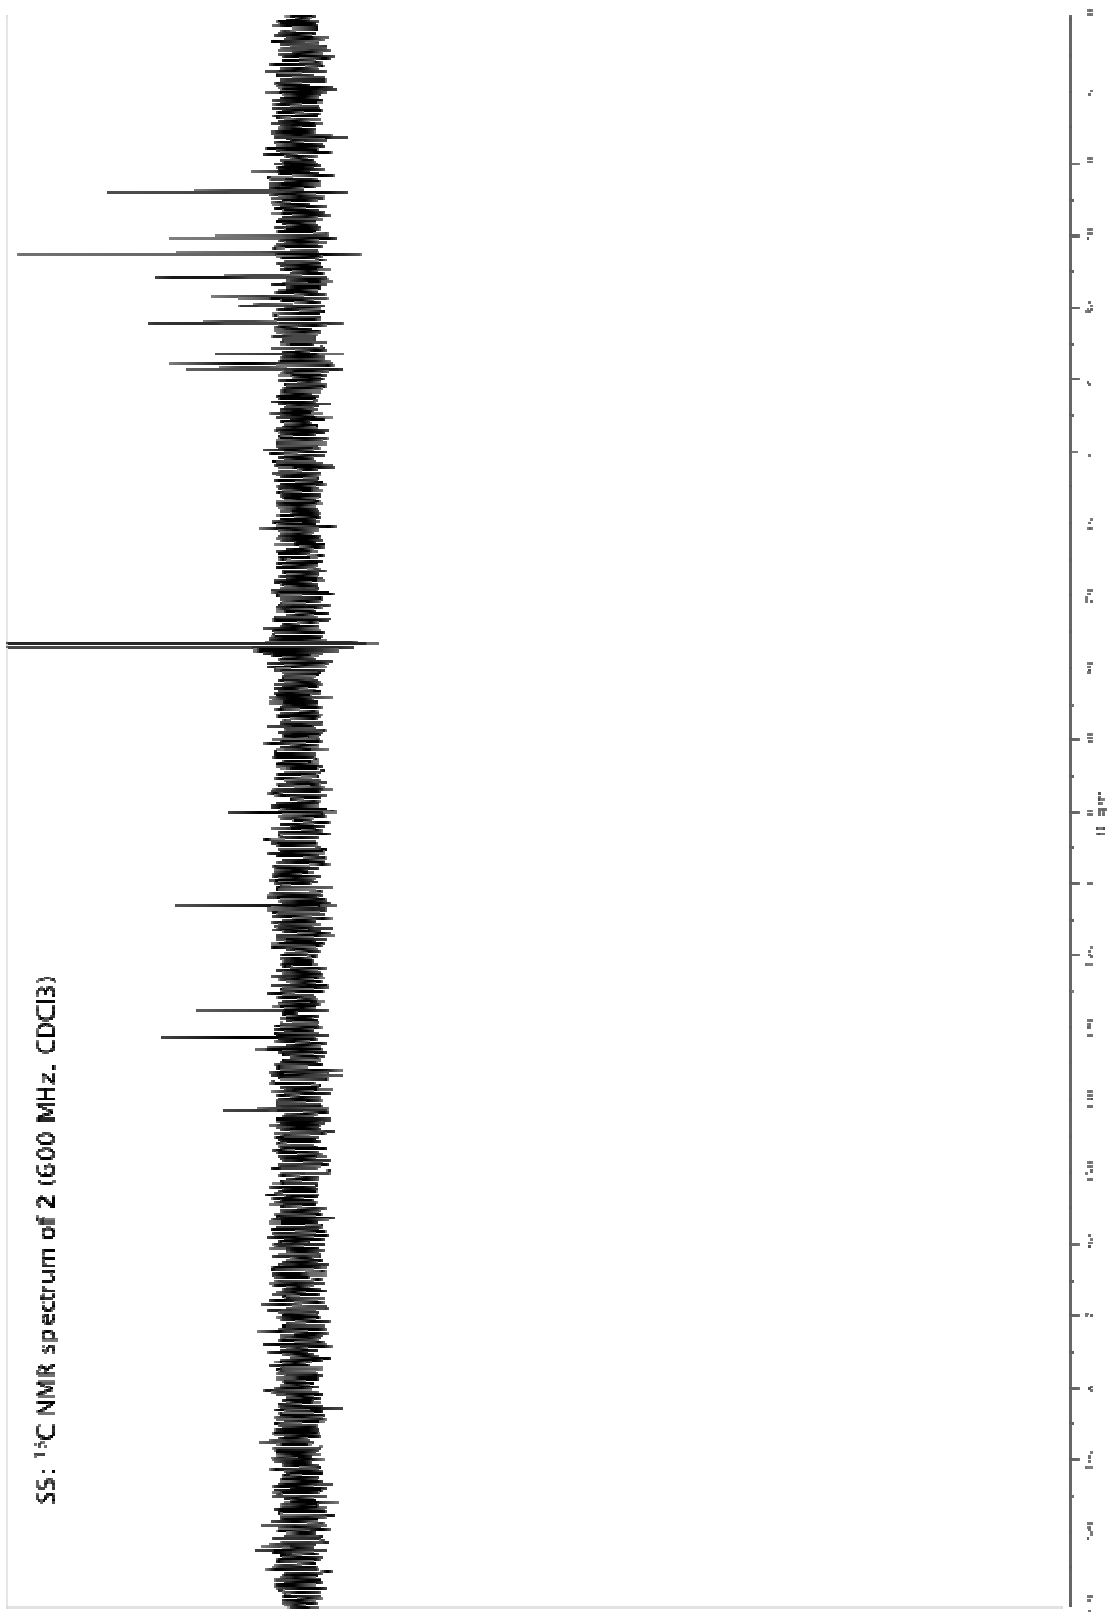

S6:  $^{13}\text{C}$  NMR spectrum of **3** (300 MHz,  $\text{CDCl}_3$ )

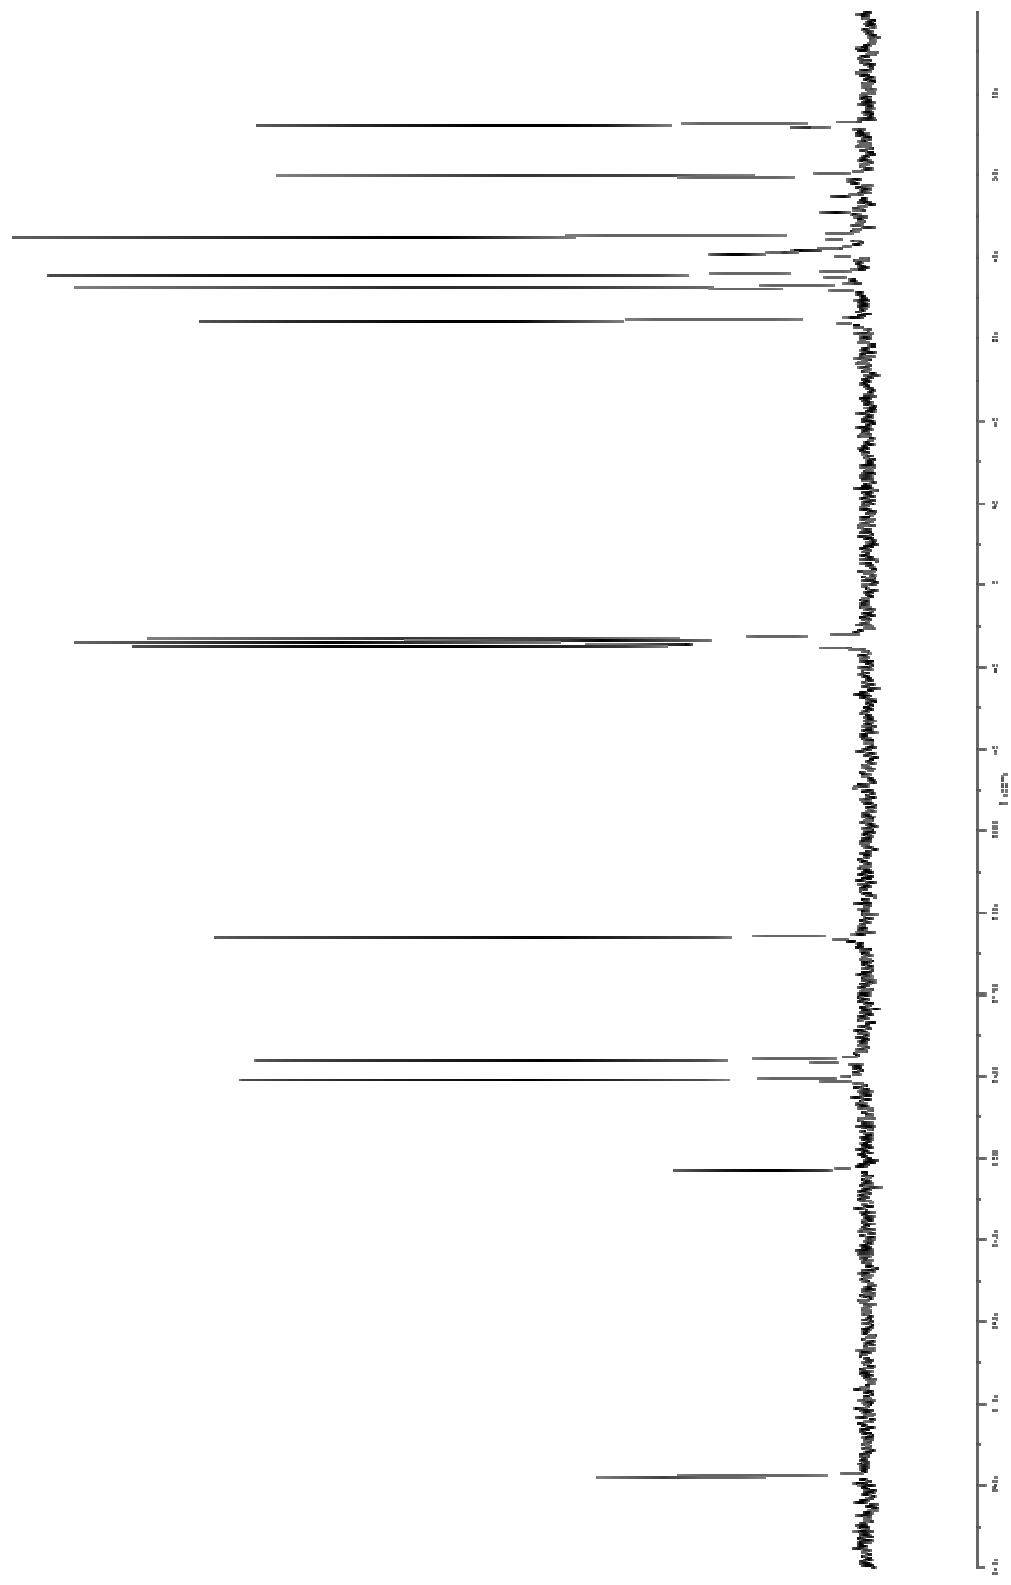



S7: COSY spectrum of 1 (500 MHz, CDCl<sub>3</sub>)

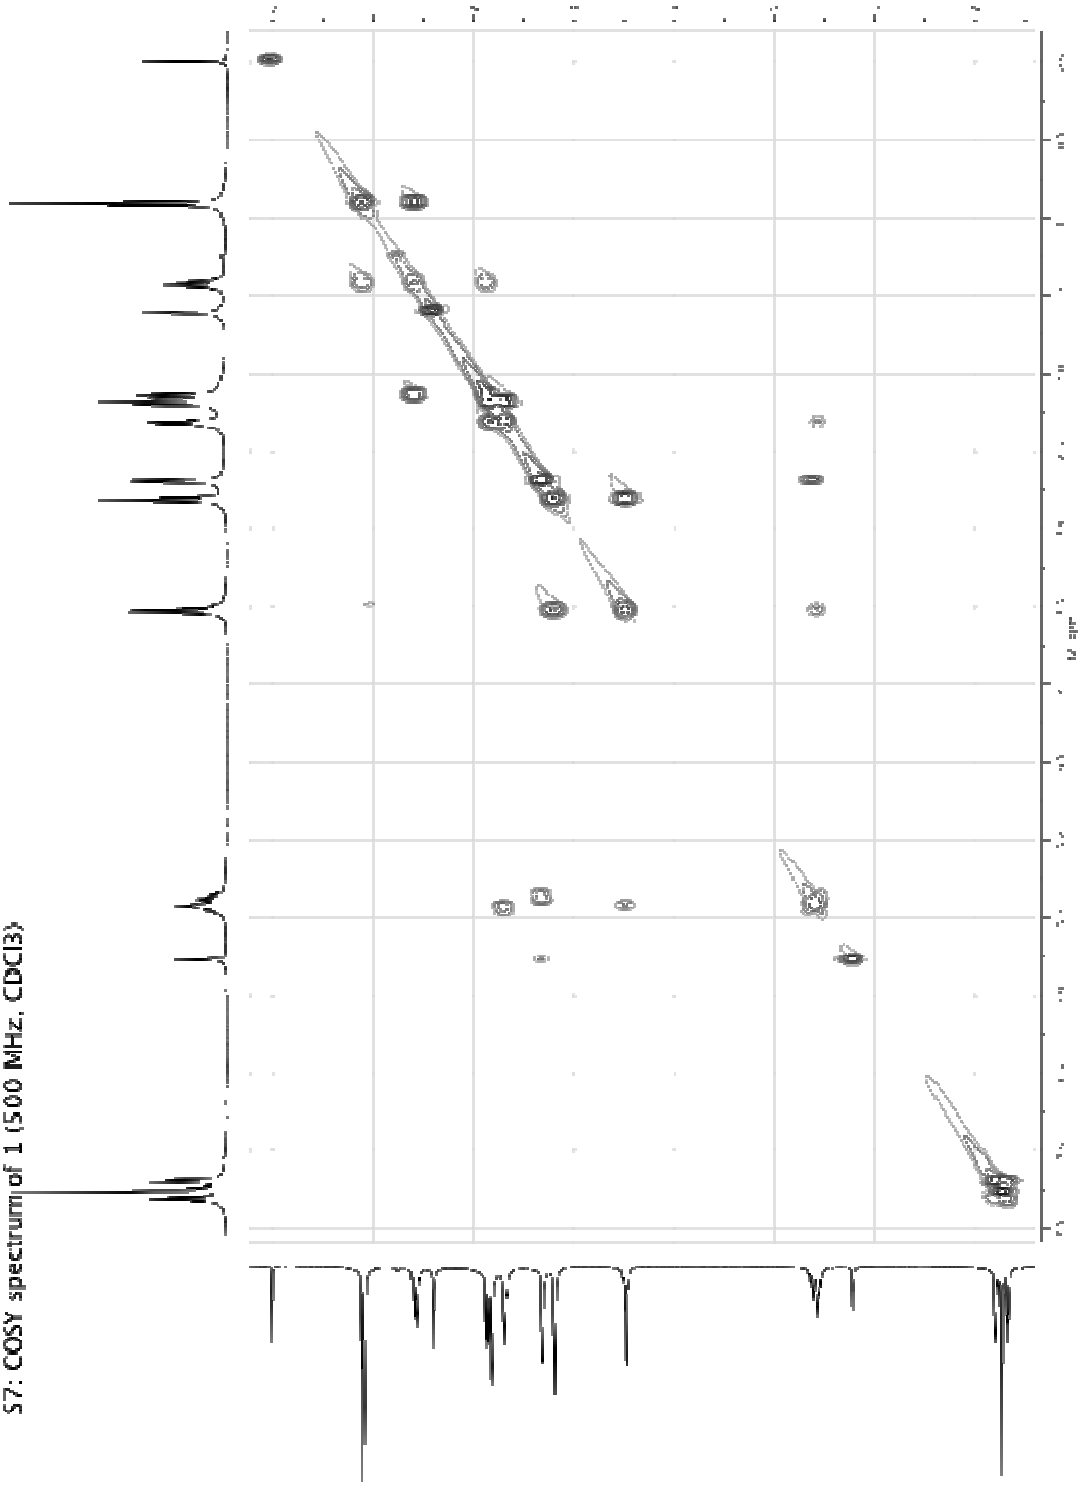

S8: COSY spectrum of 2 (600 MHz, CDCl<sub>3</sub>)

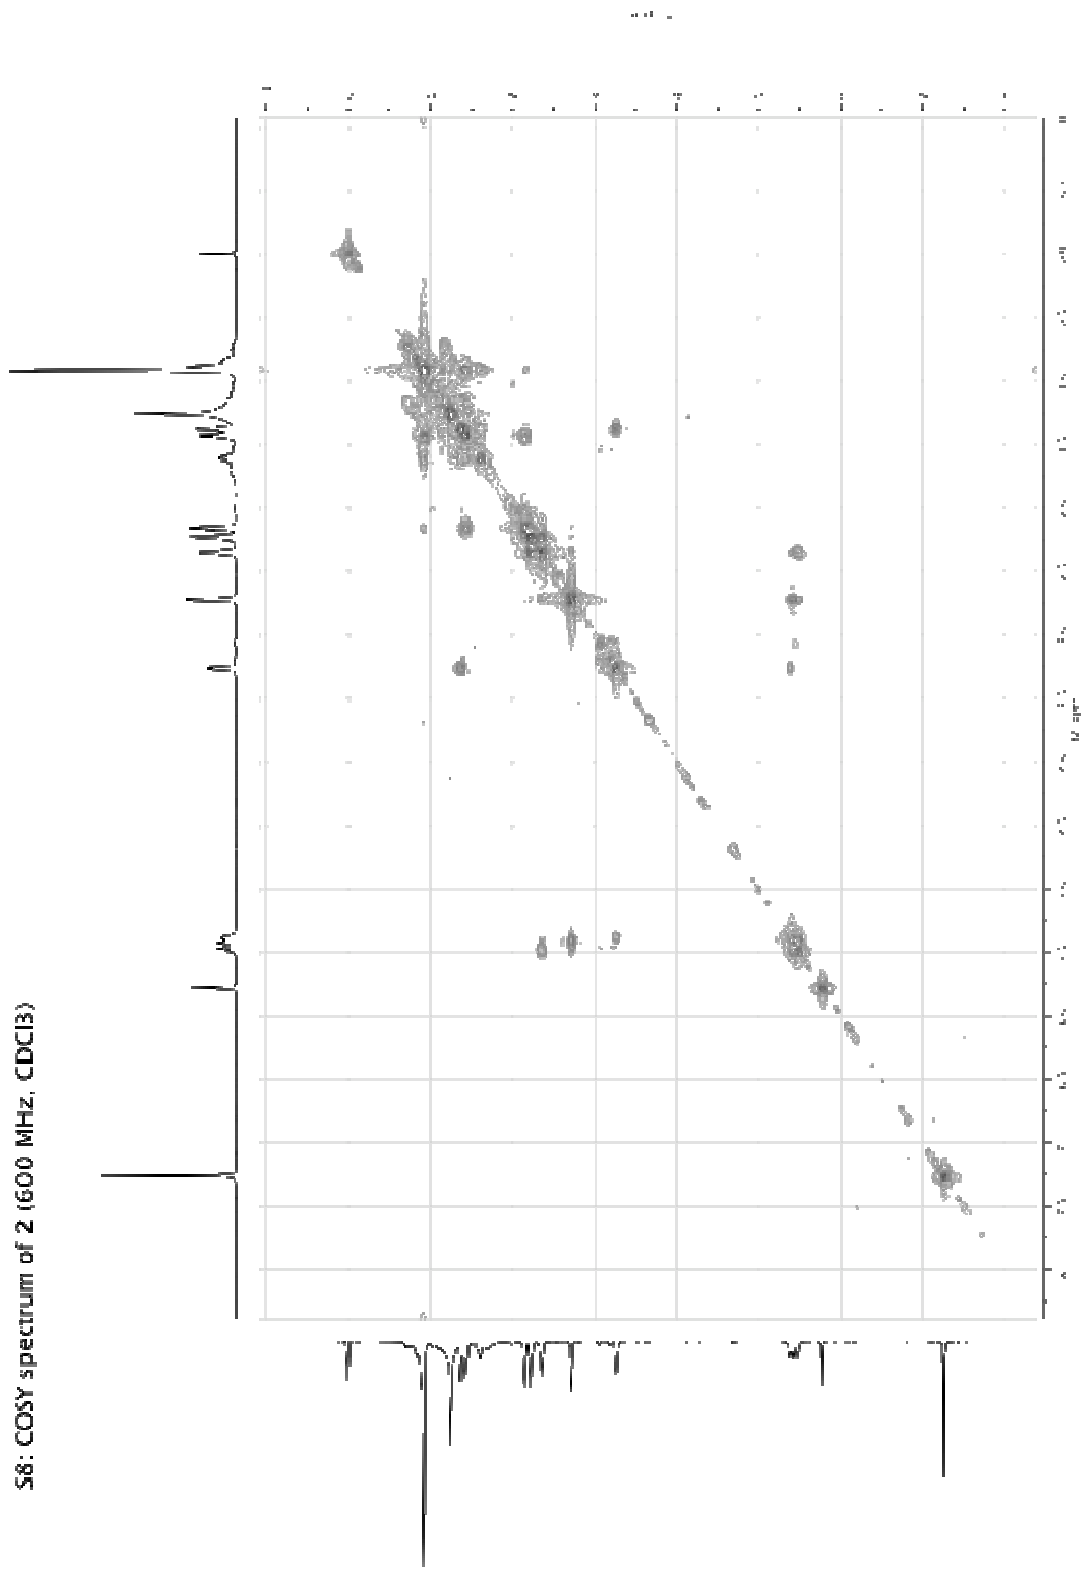

S9: COSY spectrum of **3** (500 MHz, CDCl<sub>3</sub>)

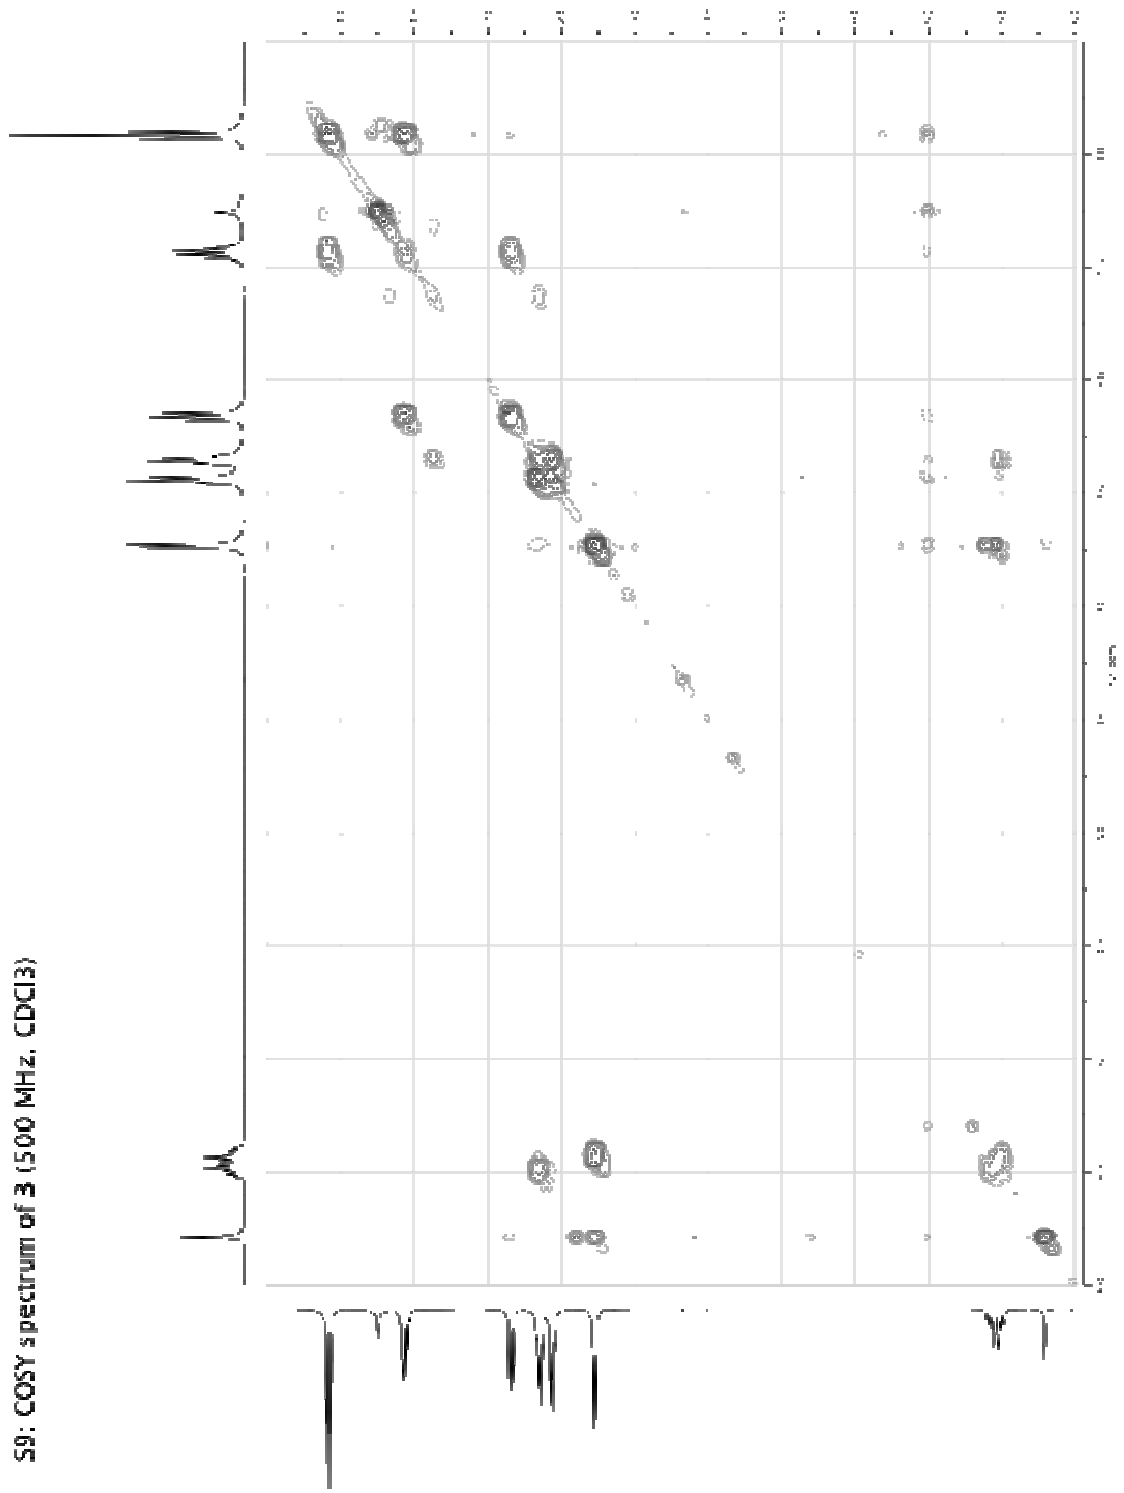

S10: gHMBC spectrum of 1 (500 MHz, CDCl<sub>3</sub>)

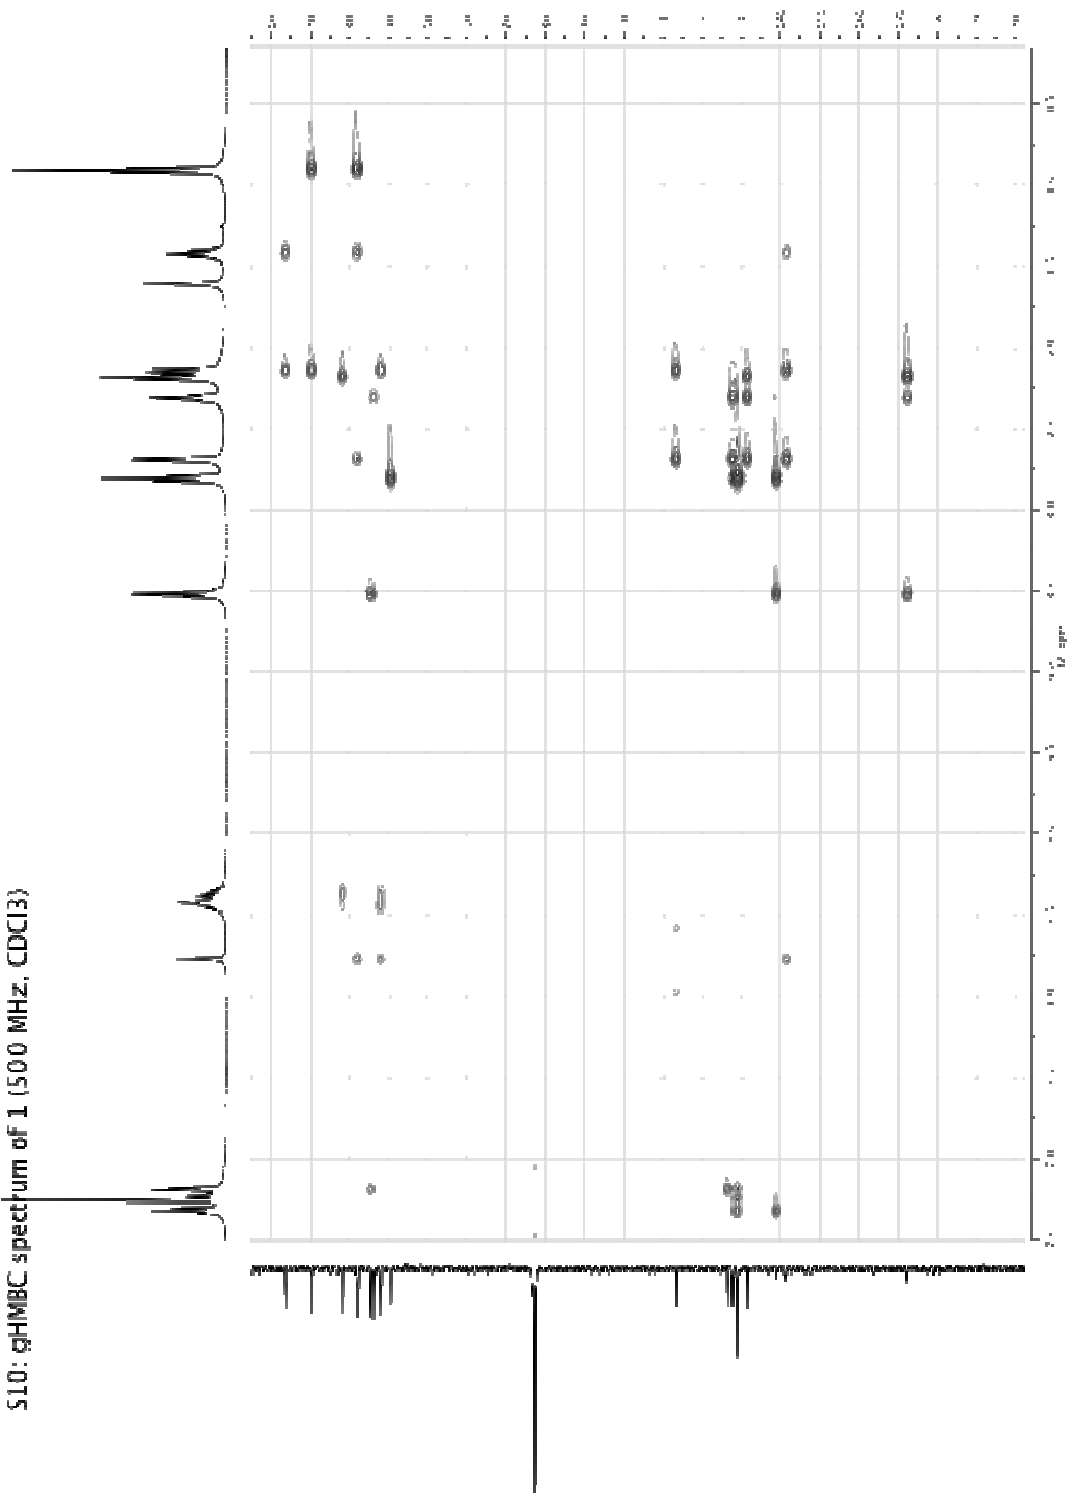

S11: HMBC spectrum of 2 (600 MHz, CDCl<sub>3</sub>)

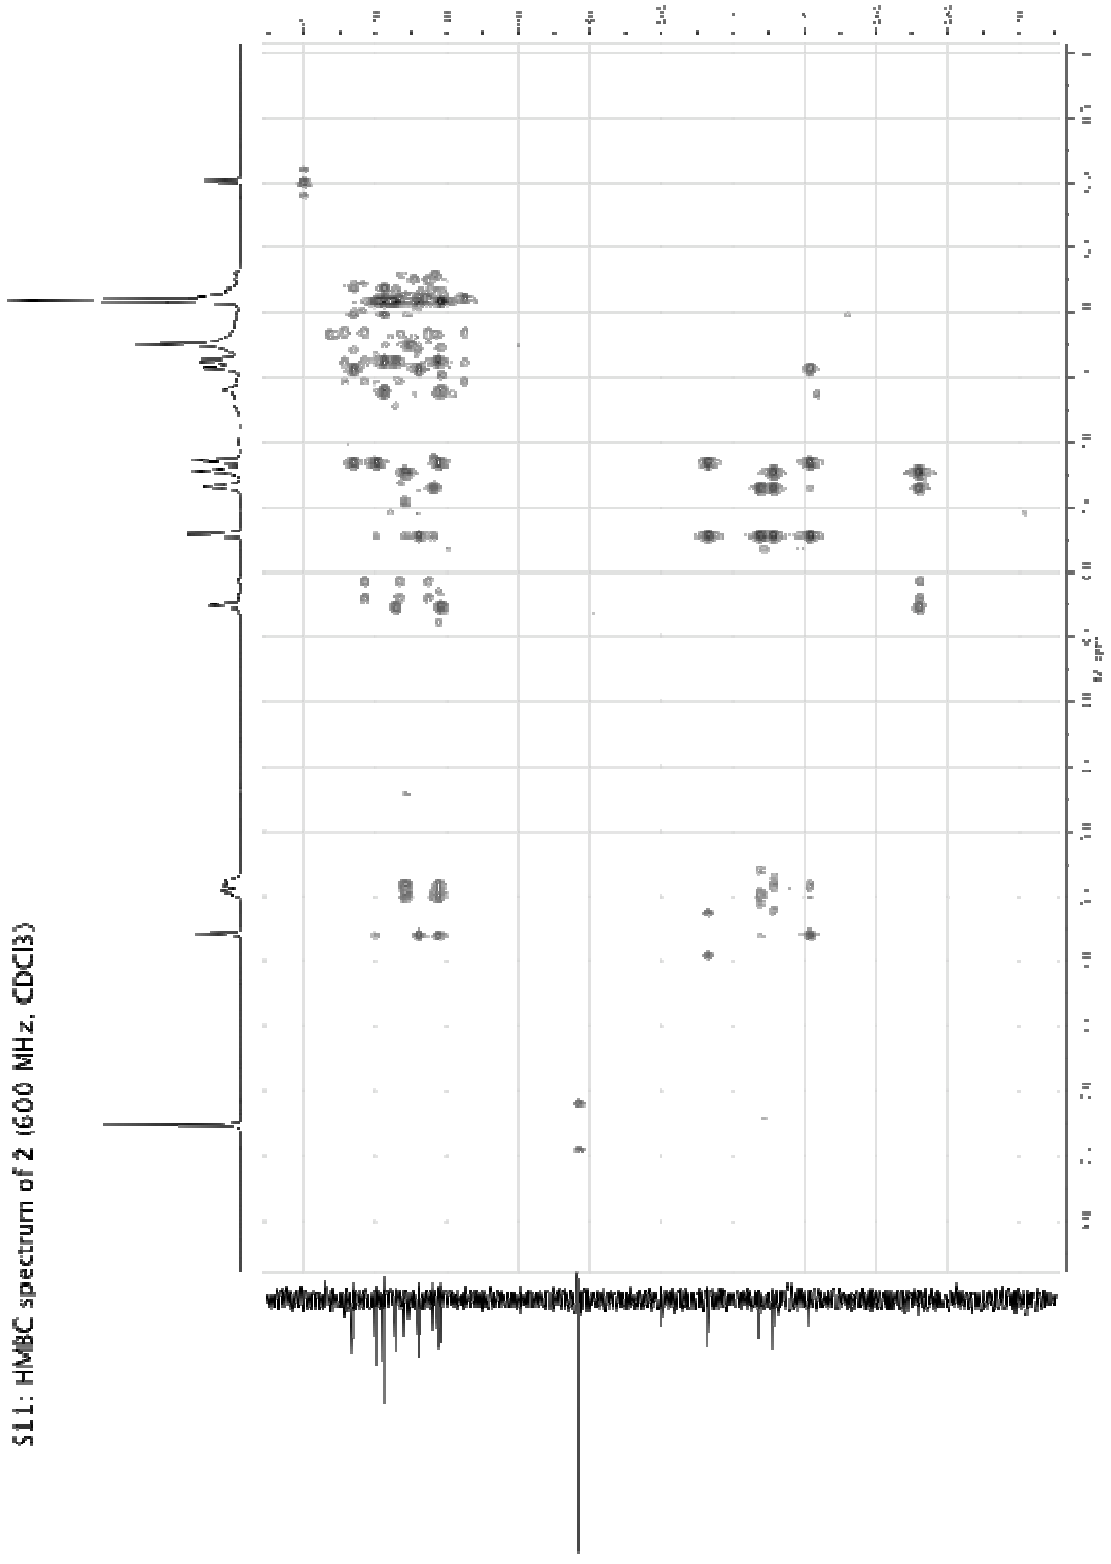

S12: HMBC spectrum of 3 (500 MHz, CDCl<sub>3</sub>)

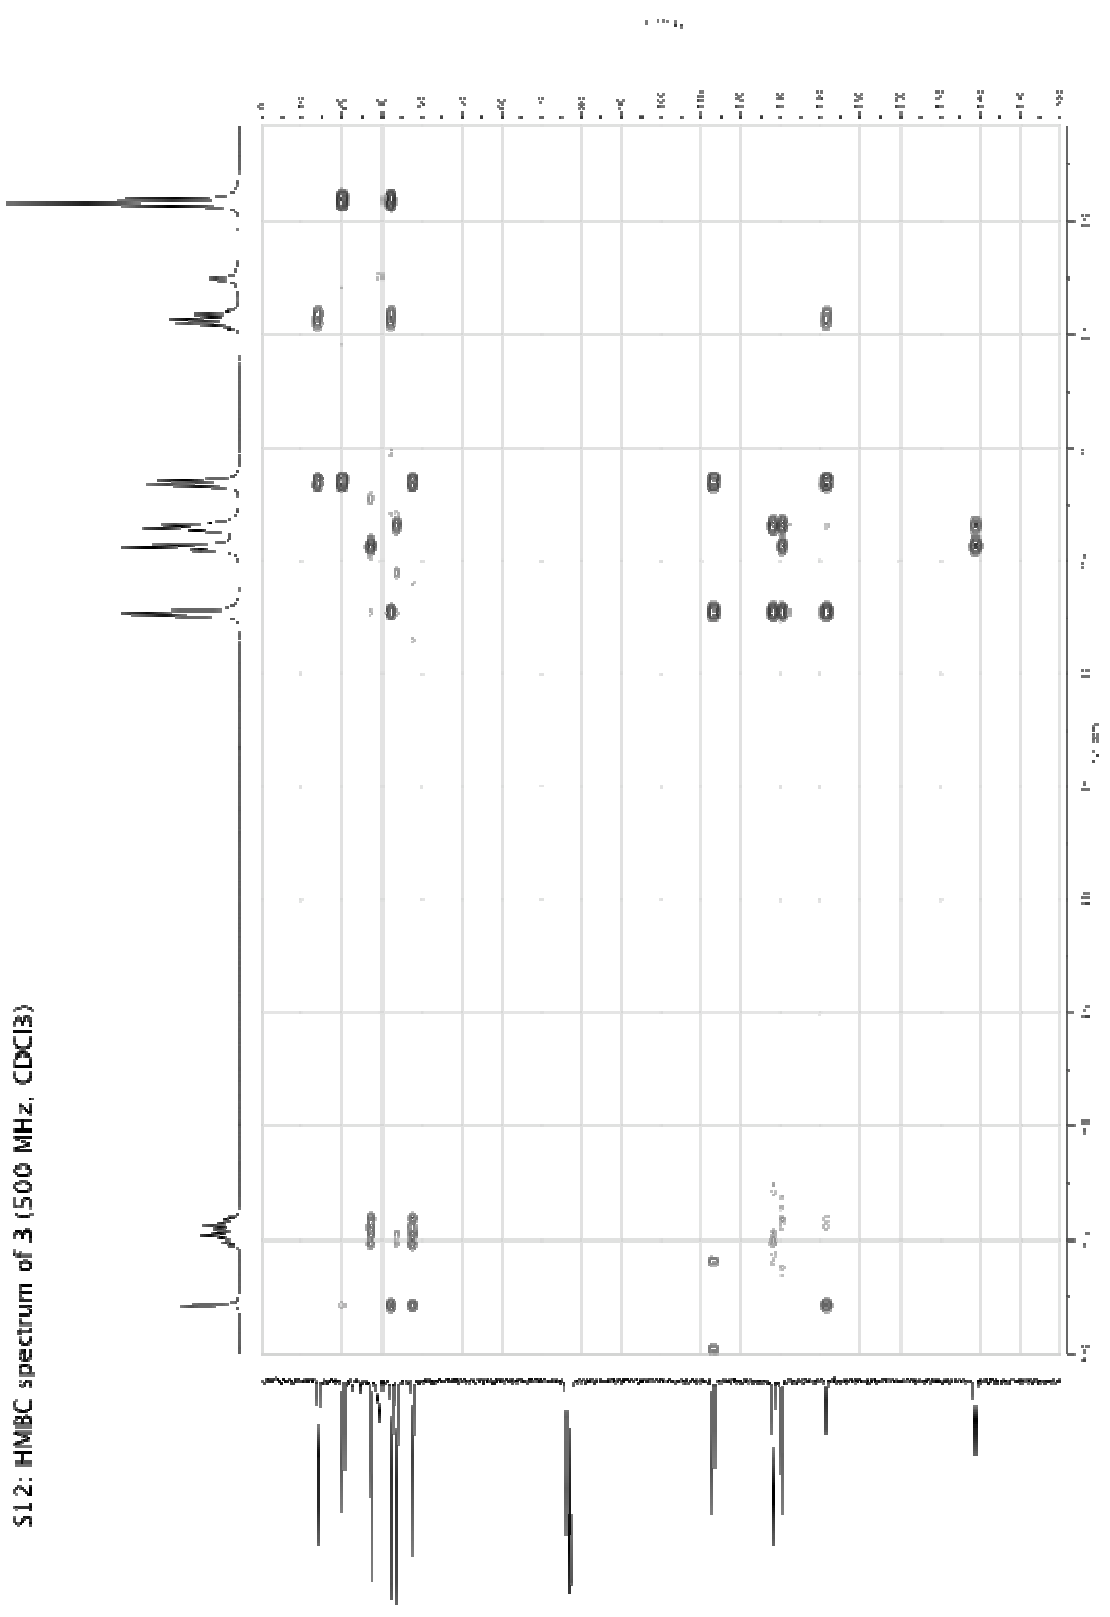

S13: gHSQC spectrum of 1 (500 MHz, CDCl<sub>3</sub>)

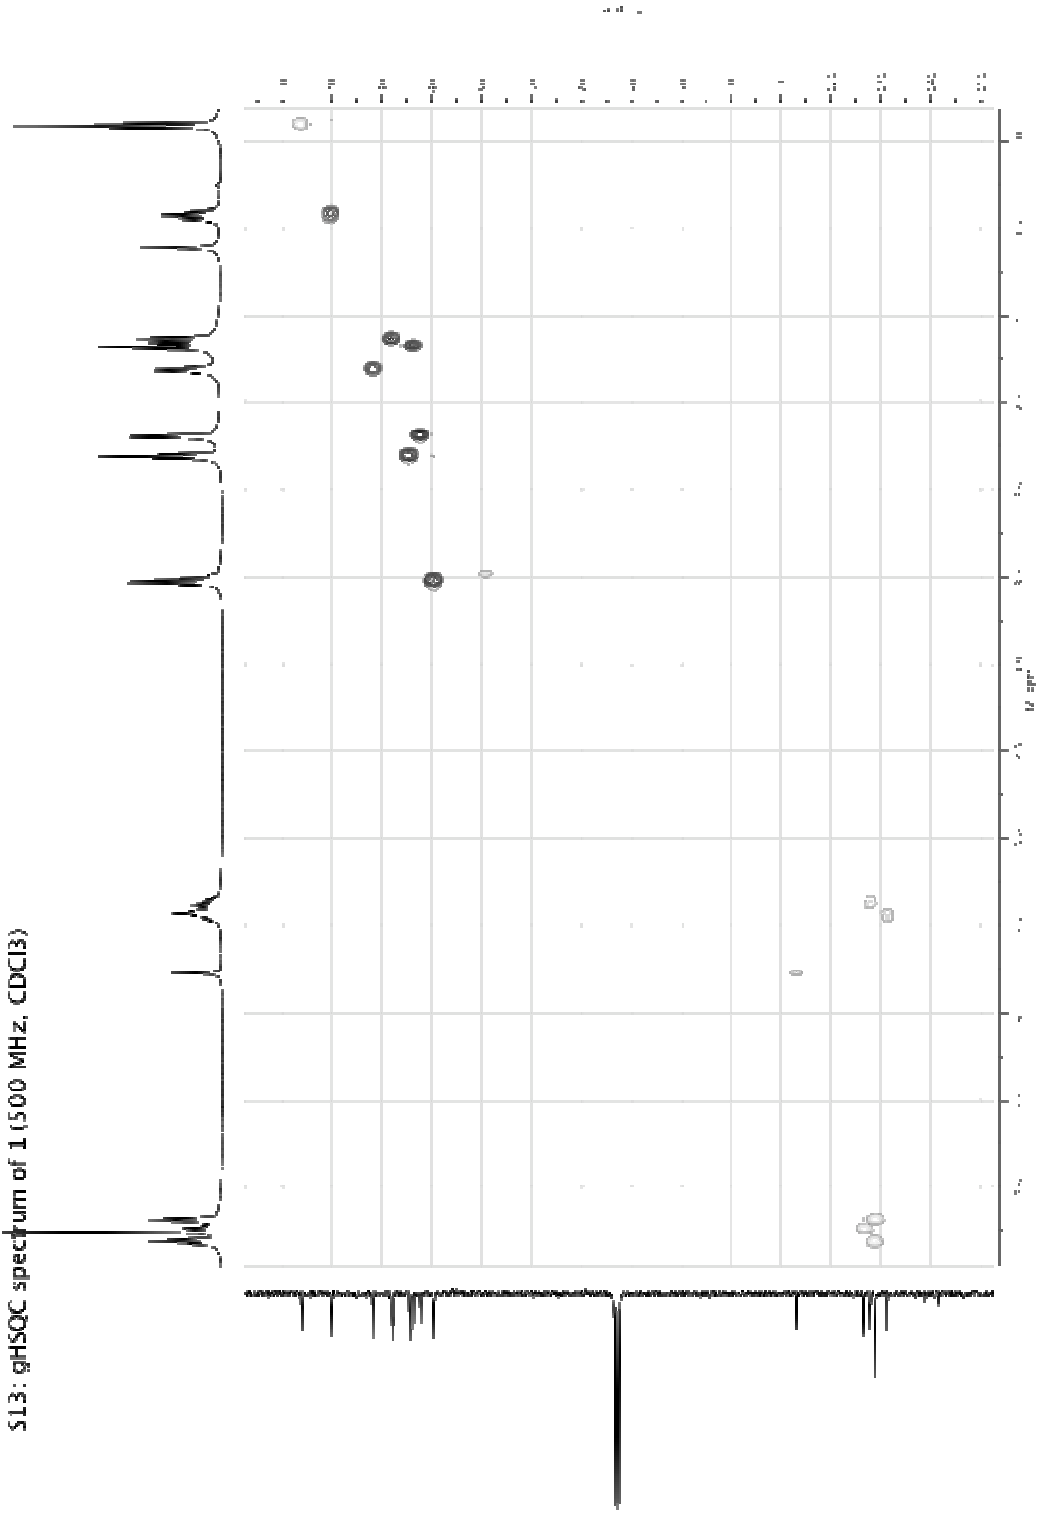

S14: HSQC spectrum of 2 (600 MHz, CDCl<sub>3</sub>)

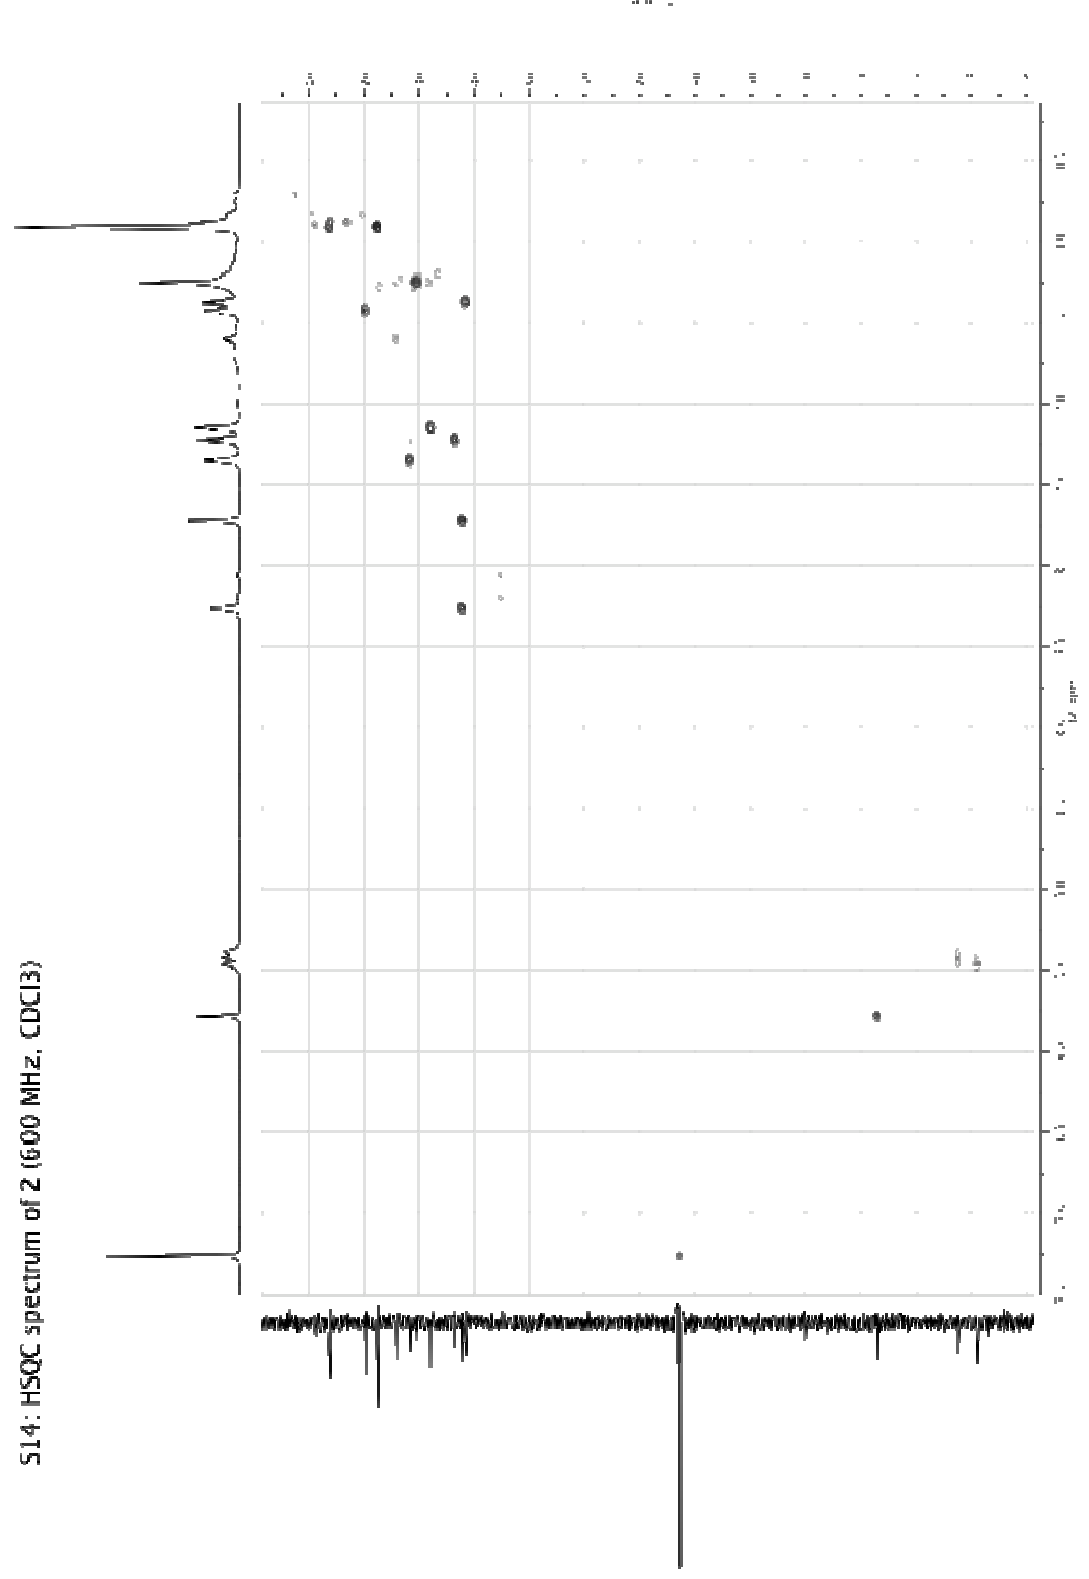



SLS. HSQC spectrum of **3** (500 MHz, CDCl<sub>3</sub>)

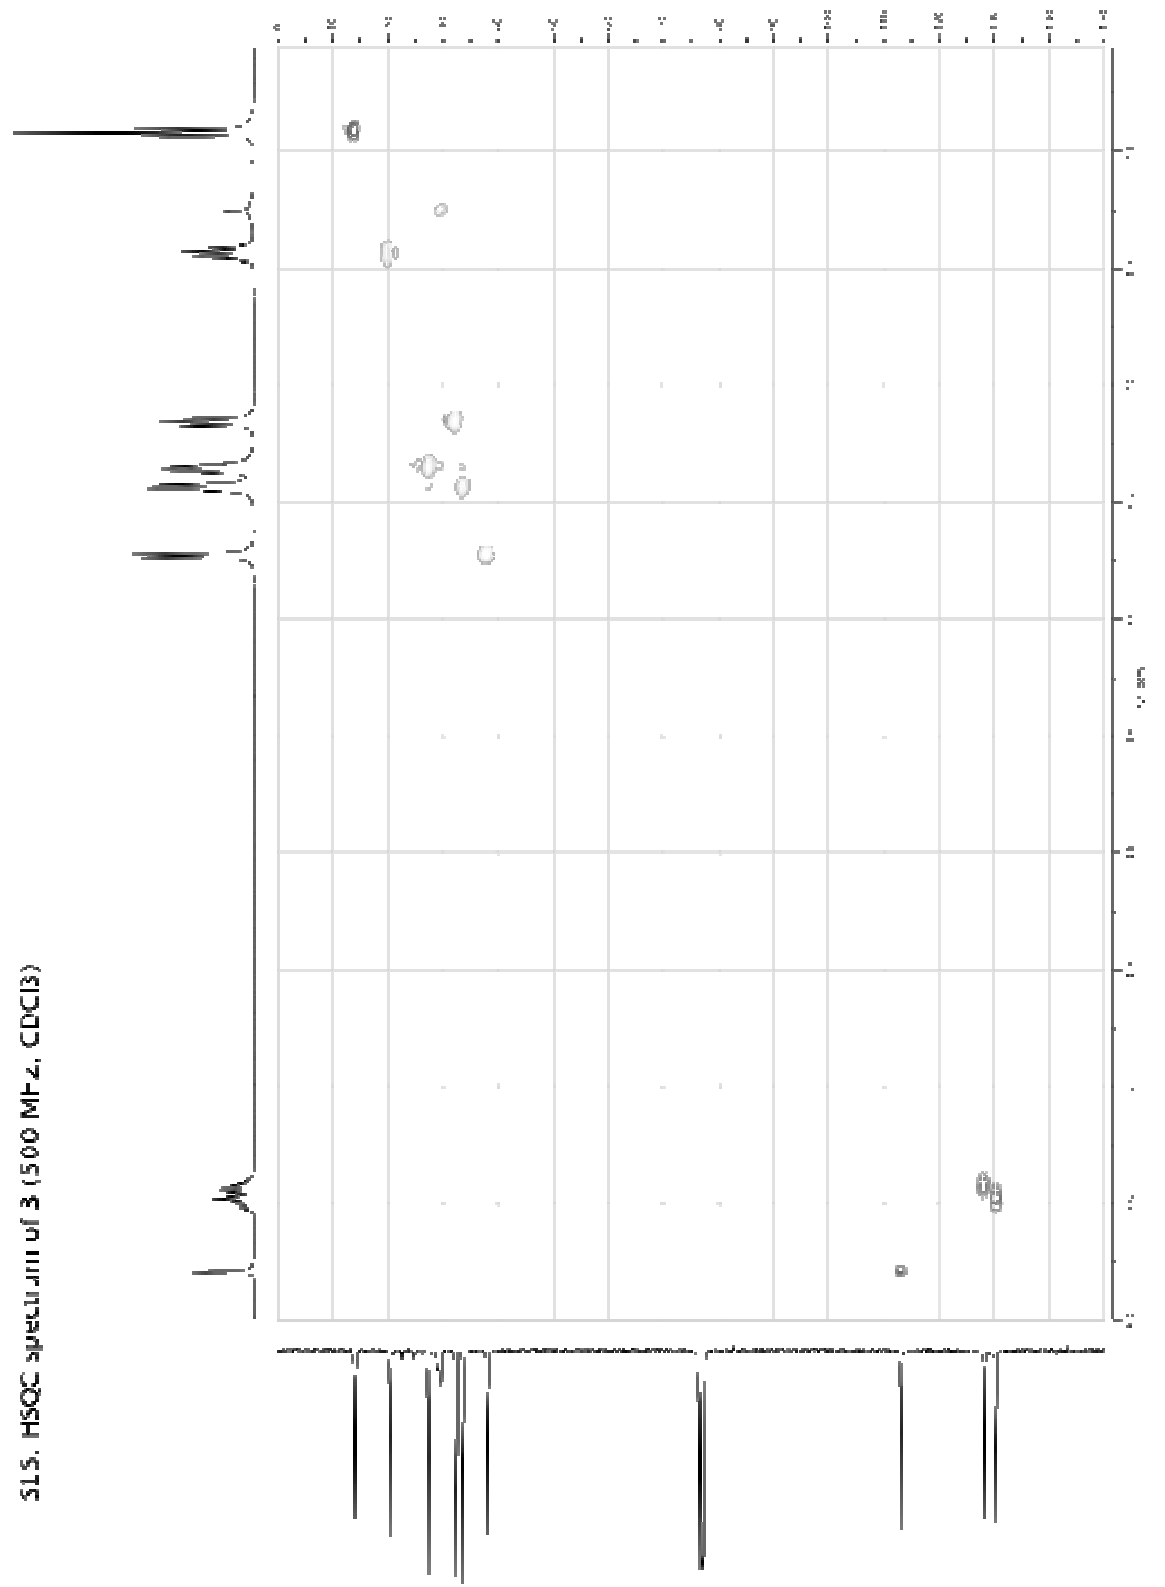

S16: NOESY spectrum of 1 (500 MHz, CDCl<sub>3</sub>)

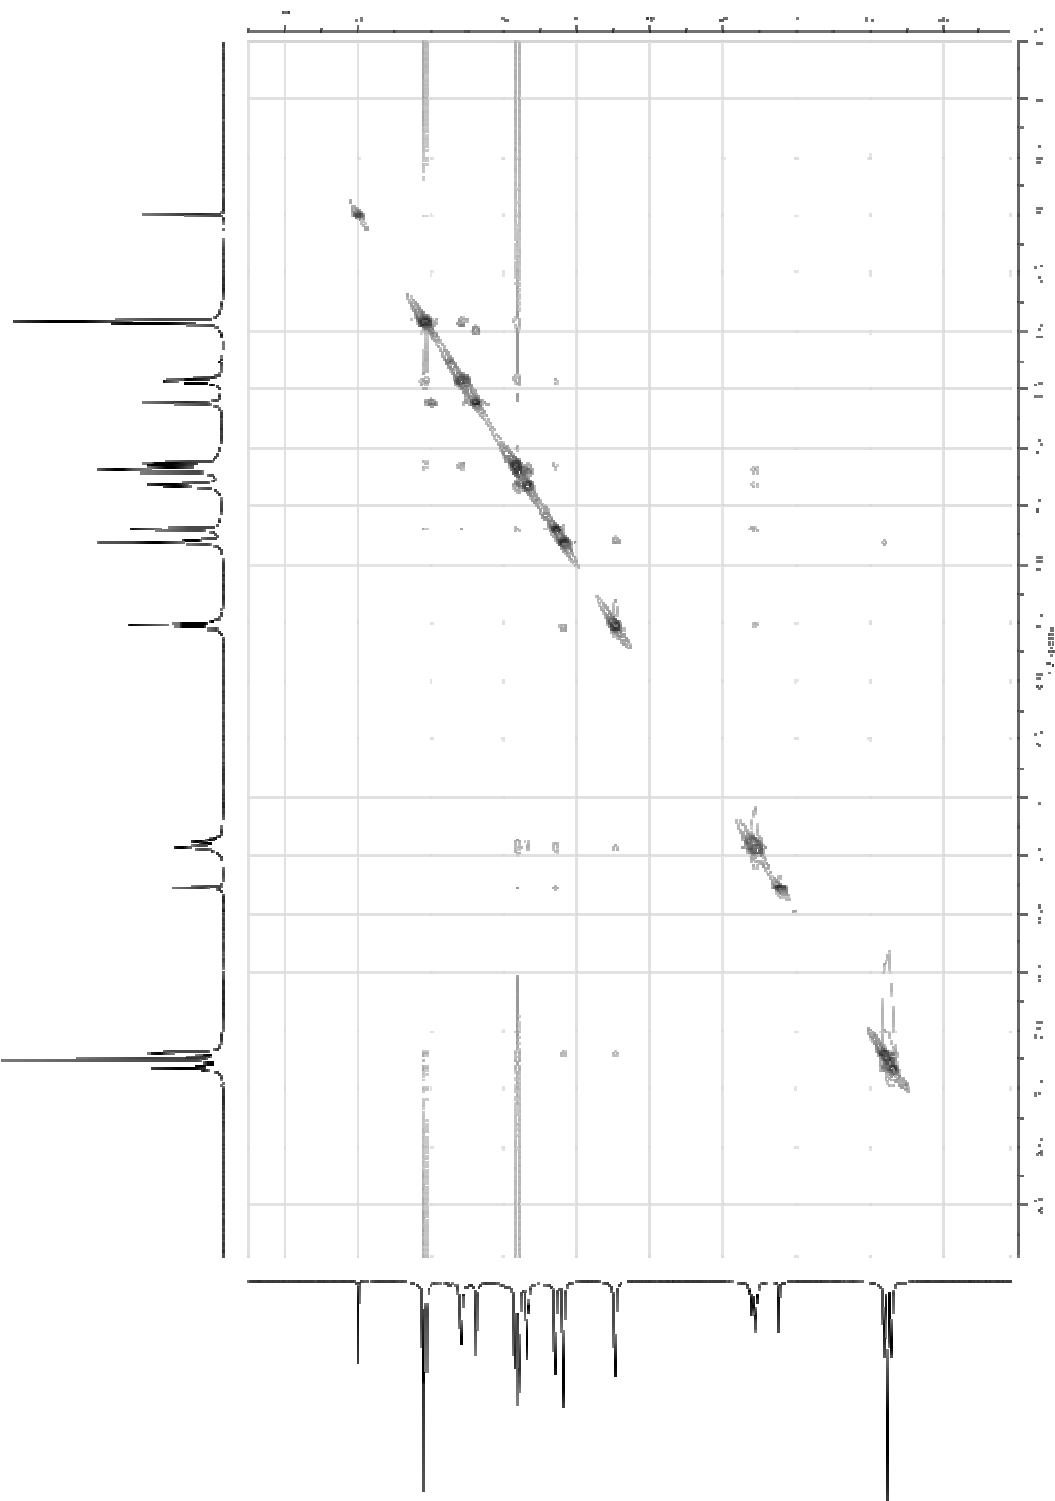

S17: NOESY spectrum of 2 (600 MHz, CDCl<sub>3</sub>)

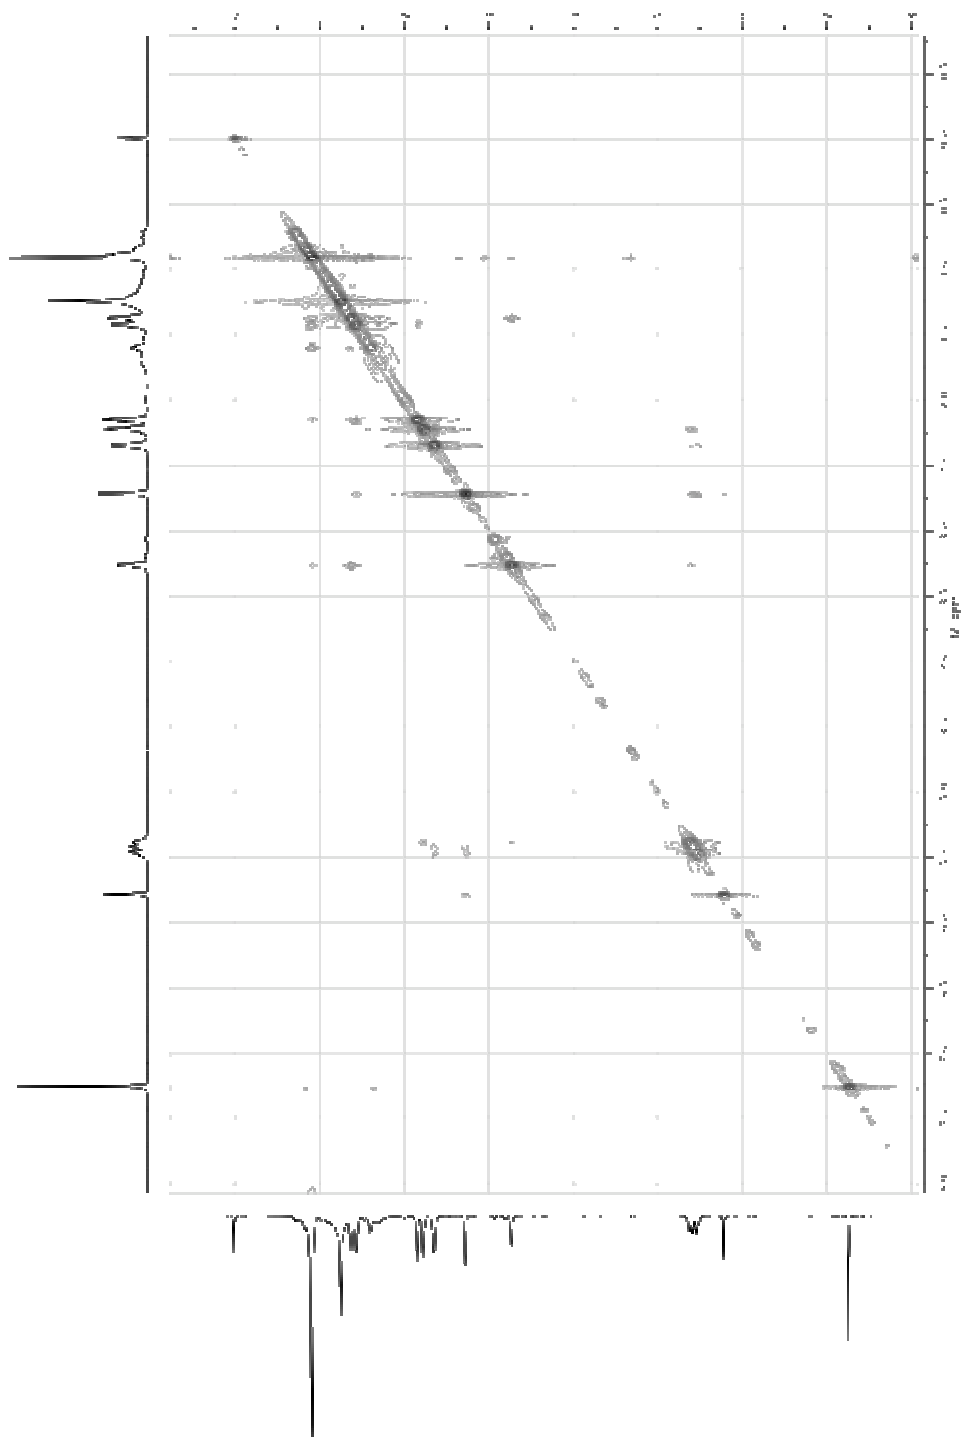

S18: ROESY spectrum of 1 (500 MHz, CDCl<sub>3</sub>)

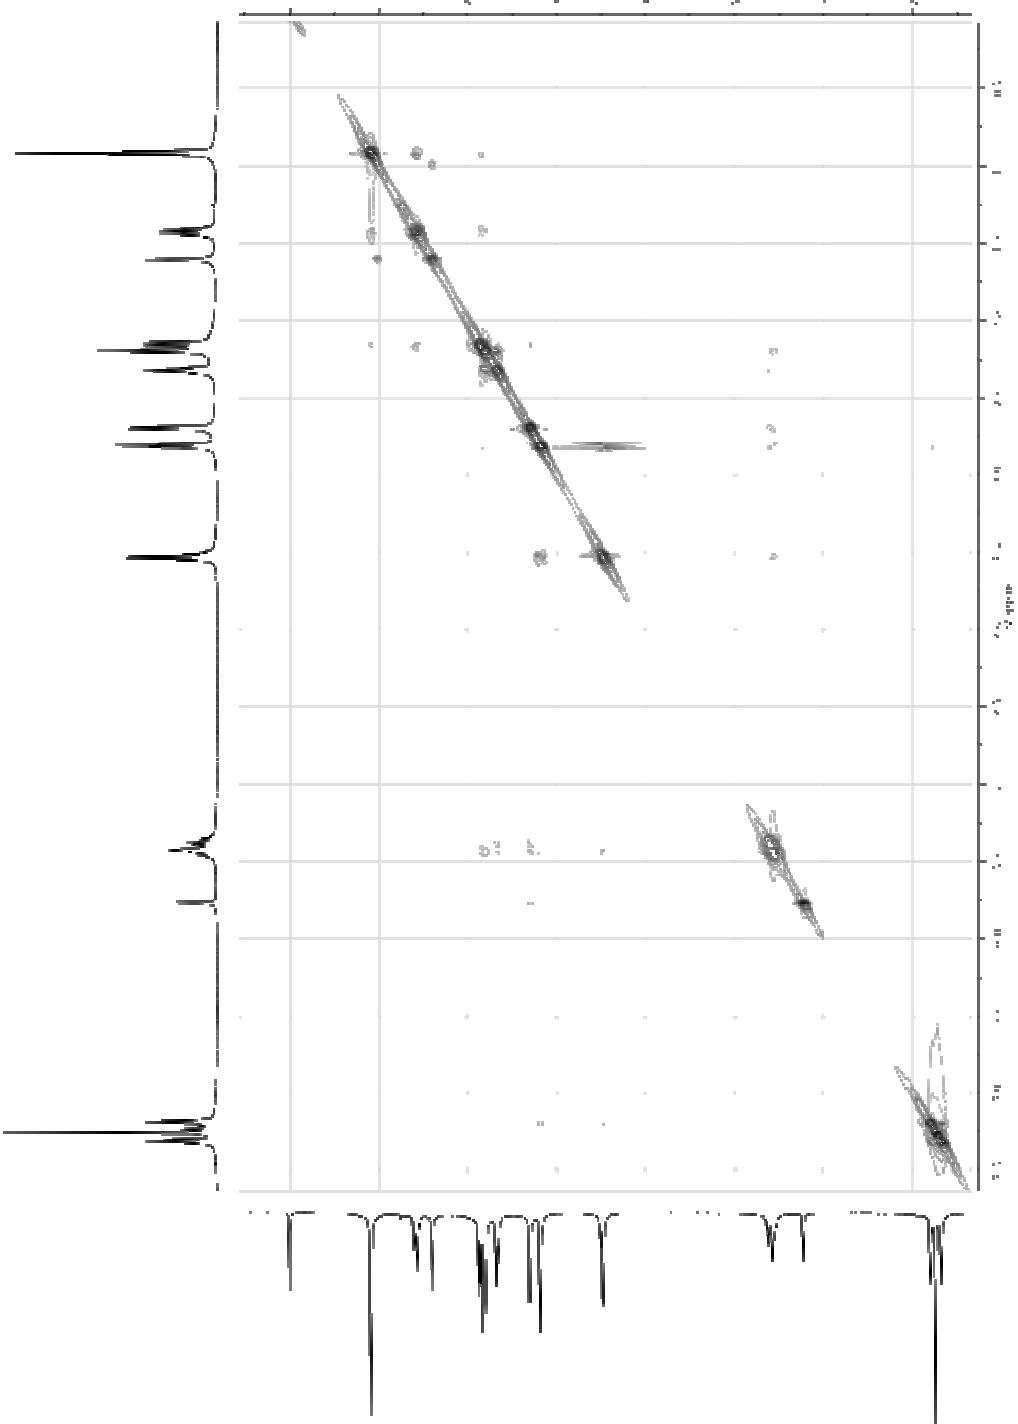

S19: 1D NOE of 1. irr 5.77 ppm (500 MHz, CDCl3)

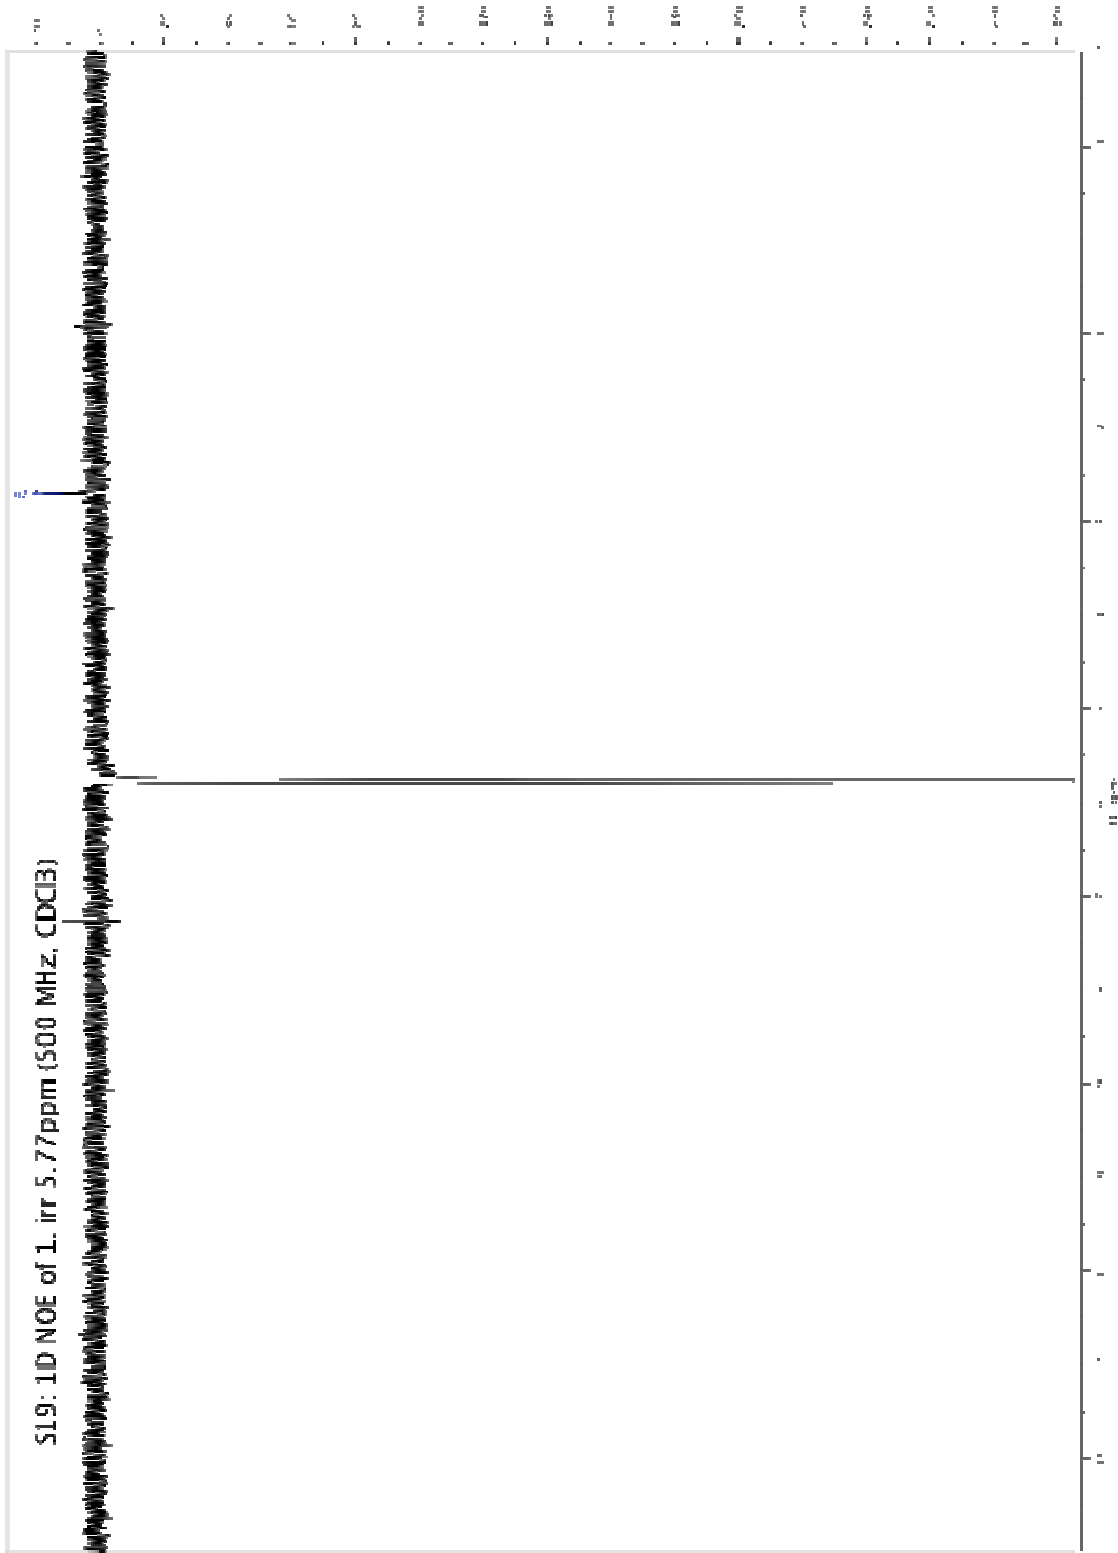

S20: 1D ROE of 3, irr 2.73 ppm (S00 MHz, CDCl3)

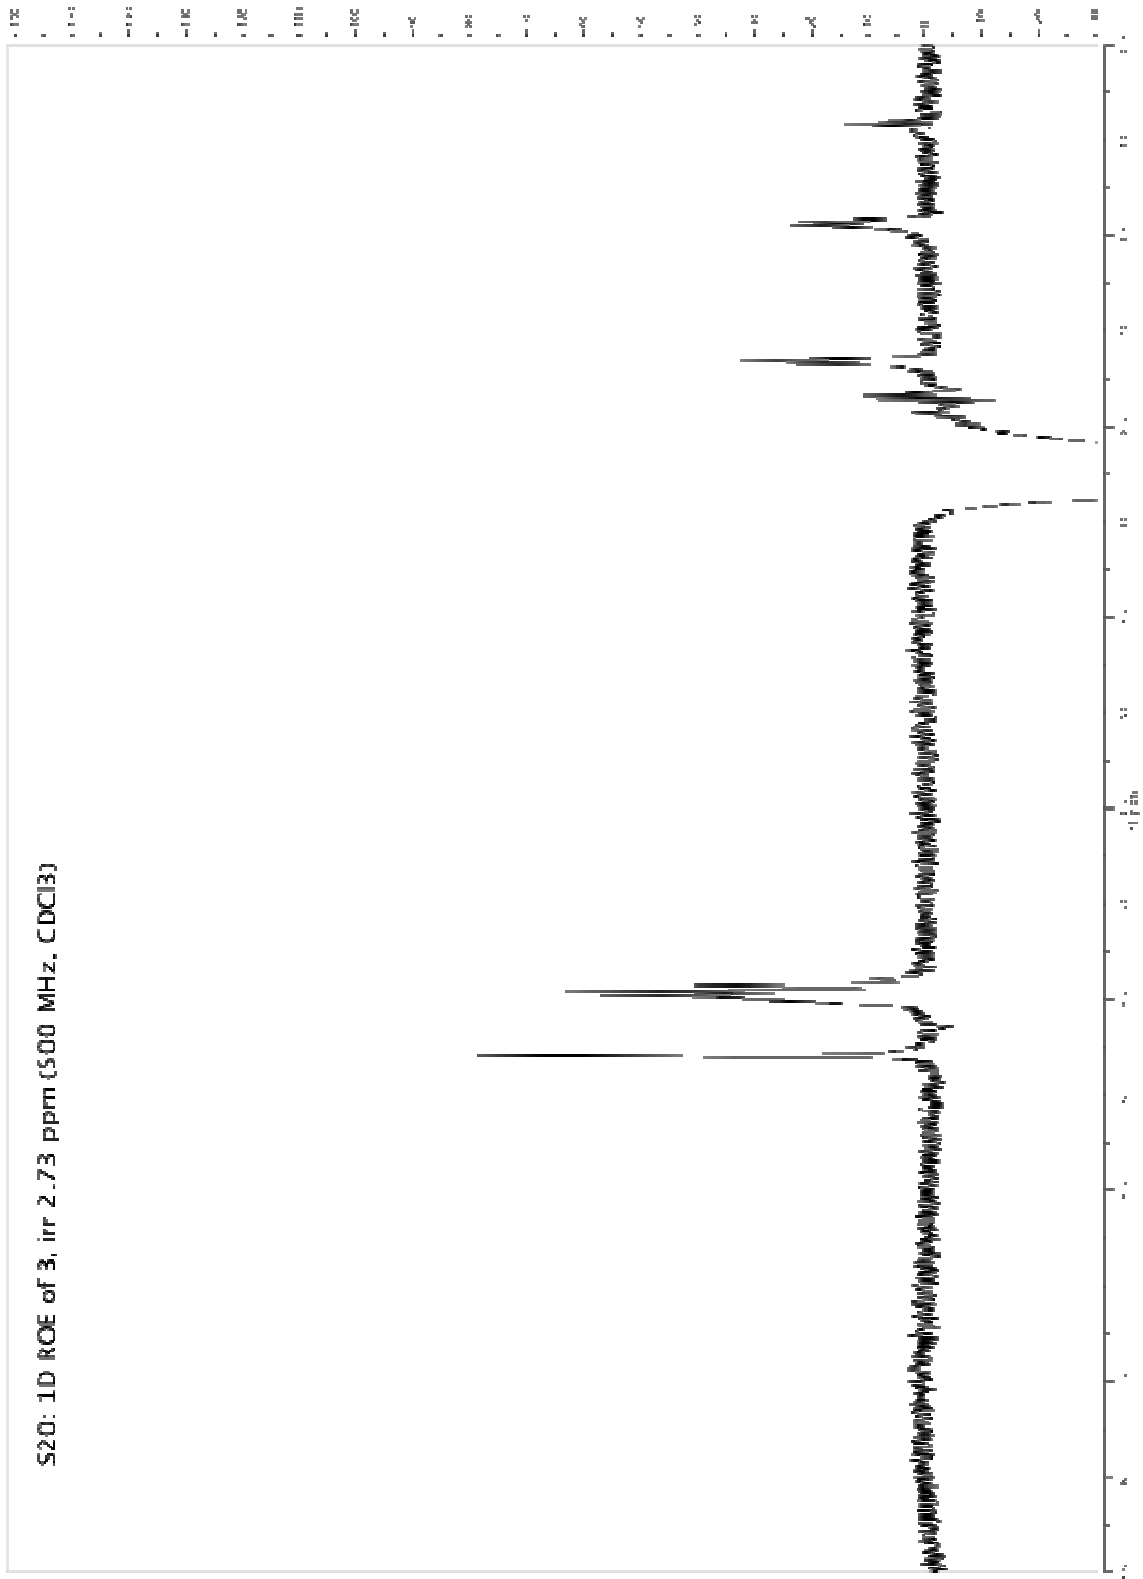

S2 1: 1D ROE of 3, in 5.79 ppm (500 MHz, CDCl3)

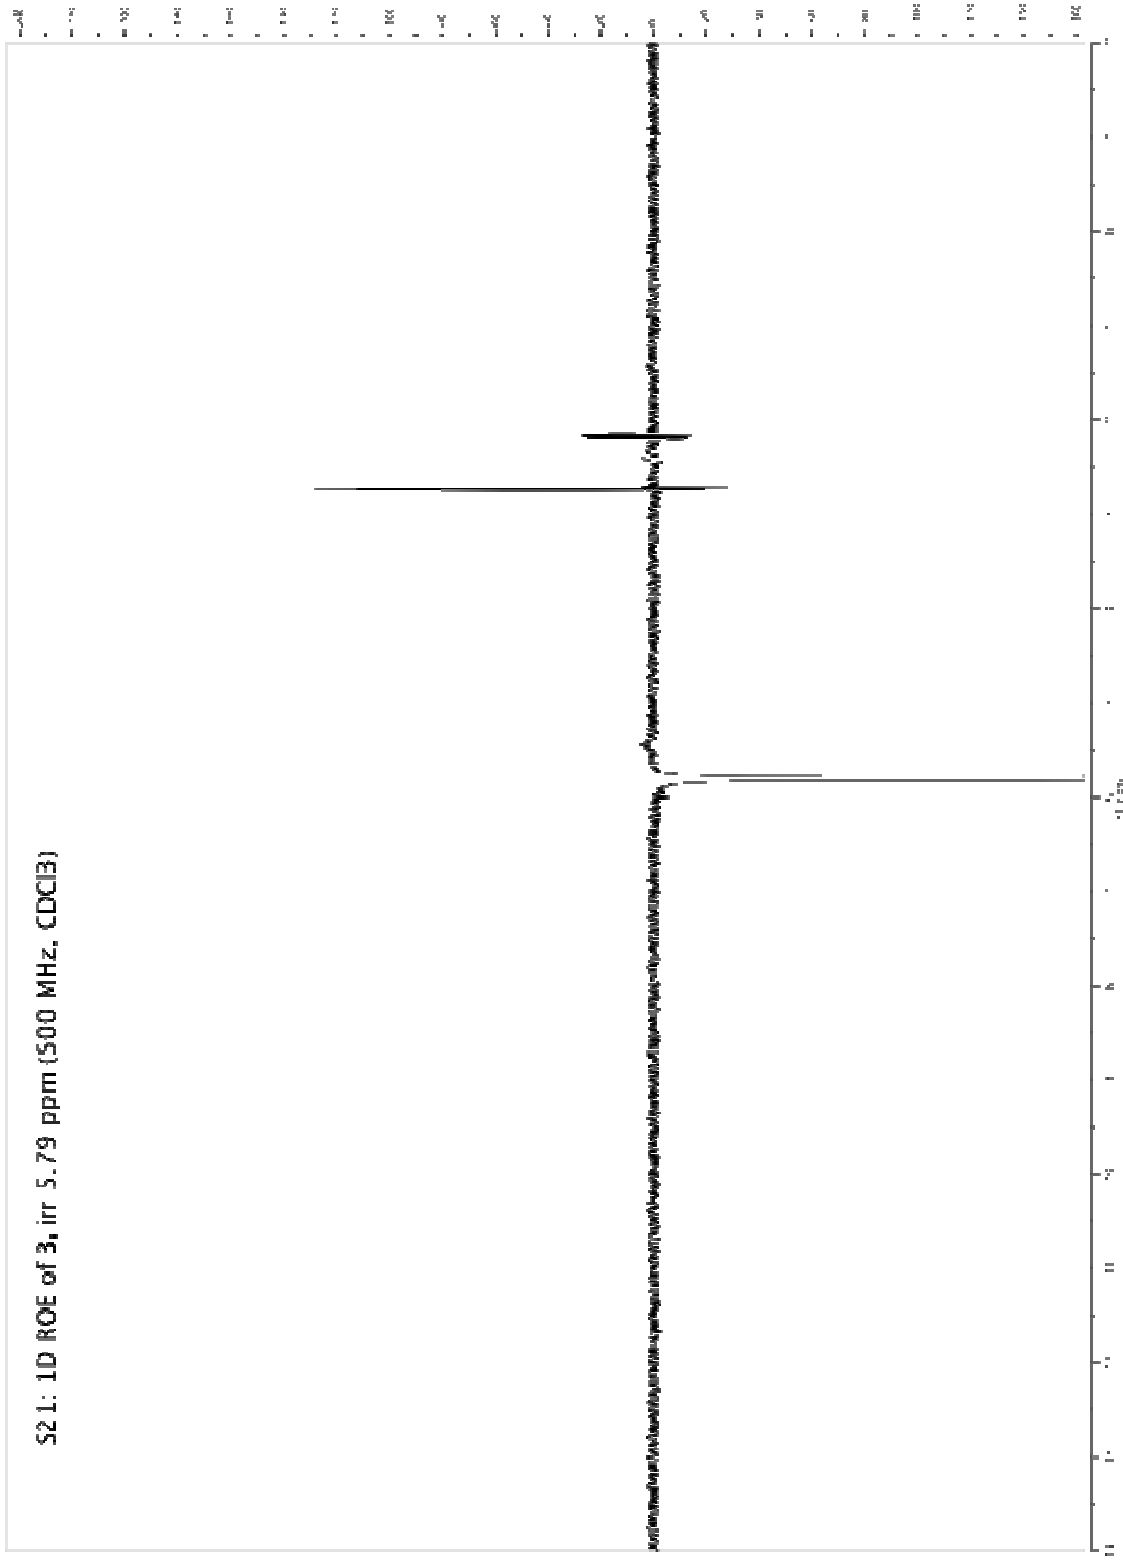

S22: 1D ROE of 3, irr 2.17 ppm (500 MHz, CDCl3)

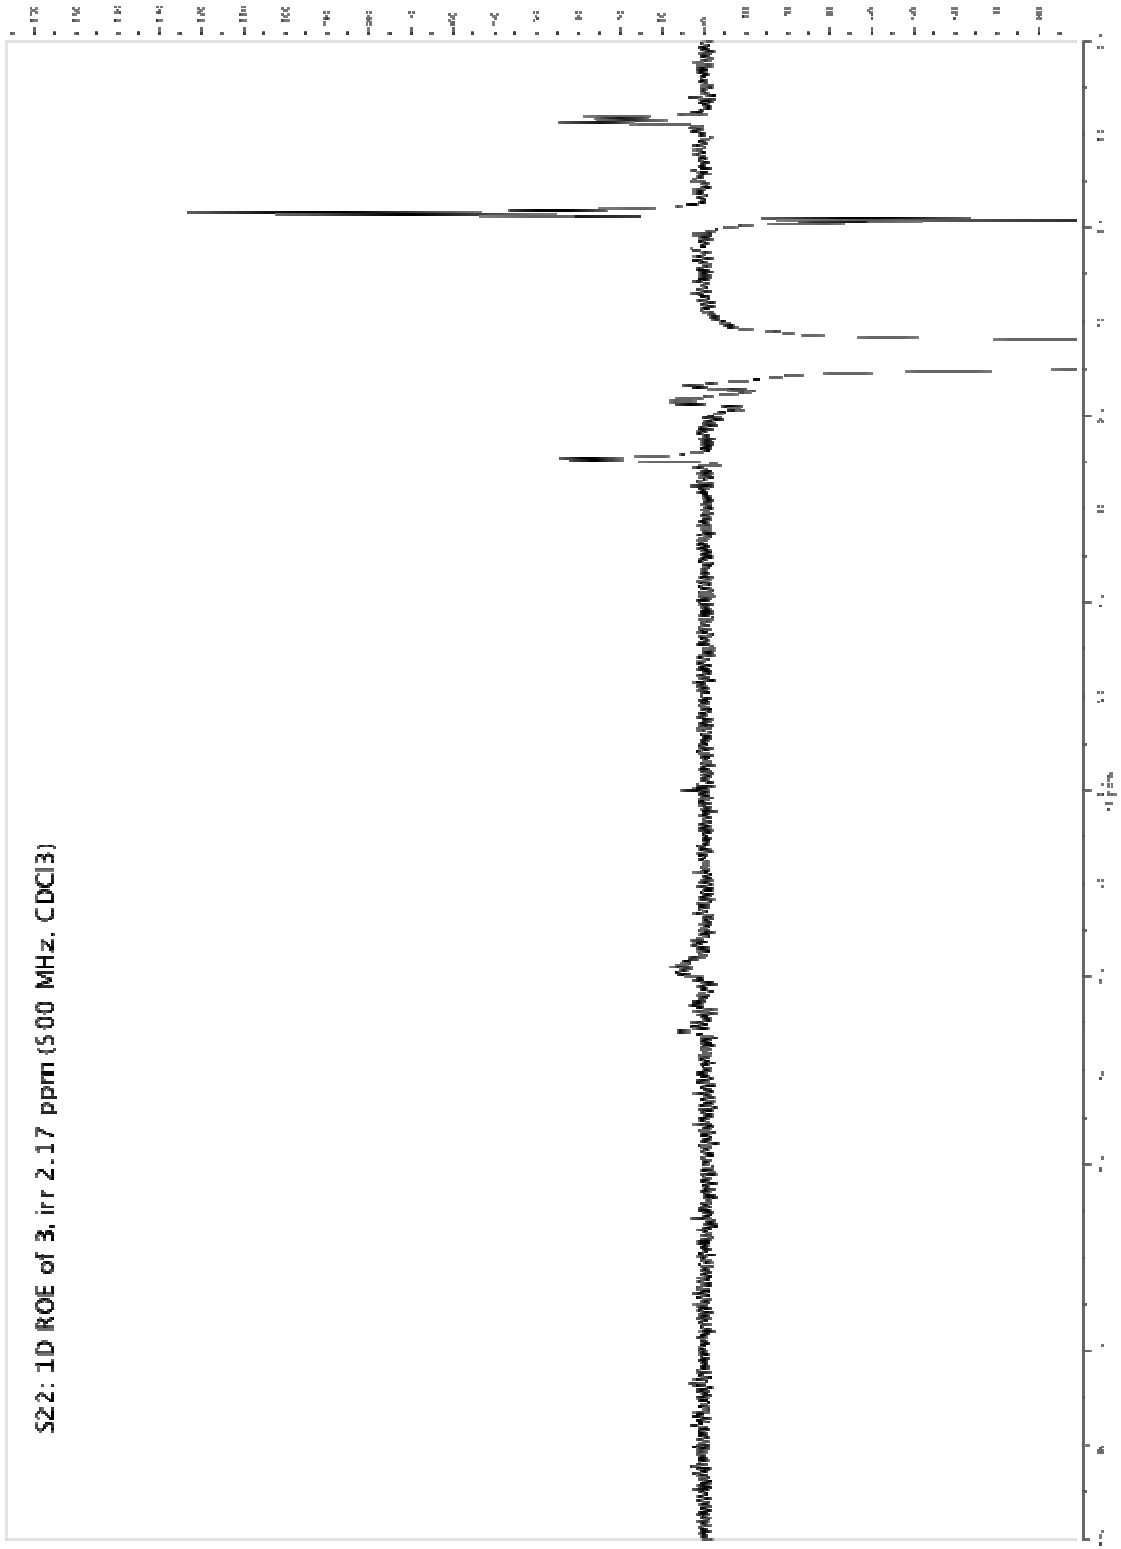

Supplement: NIHMS344145-supplement-1_si_001.pdf [file NIHMS344145-supplement-1_si_001.pdf]
